1 **A genome-scale antibiotic screen in *Serratia marcescens* identifies YdgH as a conserved**  
2 **modifier of cephalosporin and detergent susceptibility**

3 Jacob E. Lazarus<sup>1,2,3,#</sup>, Alyson R. Warr<sup>2,3</sup>, Kathleen A. Westervelt<sup>2,3</sup>, David C. Hooper<sup>1,2</sup>, Matthew  
4 K. Waldor<sup>2,3,4</sup>

5 <sup>1</sup> Department of Medicine, Division of Infectious Diseases, Massachusetts General Hospital, Harvard  
6 Medical School, Boston, MA, USA

7 <sup>2</sup> Department of Microbiology, Harvard Medical School, Boston, MA, USA

8 <sup>3</sup> Department of Medicine, Division of Infectious Diseases, Brigham and Women's Hospital, Harvard  
9 Medical School, Boston, MA, USA

10 <sup>4</sup> Howard Hughes Medical Institute, Boston, MA, USA

11 \* Correspondence to [Jacob.Lazarus@mgh.harvard.edu](mailto:Jacob.Lazarus@mgh.harvard.edu)

12

13 **Running Title:** Antibiotic whole-genome screen in *Serratia marcescens*

14 **Abstract:**

15 *Serratia marcescens*, a member of the order Enterobacterales, is adept at colonizing healthcare  
16 environments and an important cause of invasive infections. Antibiotic resistance is a daunting  
17 problem in *S. marcescens* because in addition to plasmid-mediated mechanisms, most isolates  
18 have considerable intrinsic resistance to multiple antibiotic classes. To discover endogenous  
19 modifiers of antibiotic susceptibility in *S. marcescens*, a high-density transposon insertion  
20 library was subjected to sub-minimal inhibitory concentrations of two cephalosporins, cefoxitin  
21 and cefepime, as well as the fluoroquinolone ciprofloxacin. Comparisons of transposon  
22 insertion abundance before and after antibiotic exposure identified hundreds of potential  
23 modifiers of susceptibility to these agents. Using single gene deletions, we validated several  
24 candidate modifiers of cefoxitin susceptibility and chose *ydgH*, a gene of unknown function, for  
25 further characterization. In addition to cefoxitin, deletion of *ydgH* in *S. marcescens* resulted in  
26 decreased susceptibility to multiple 3<sup>rd</sup> generation cephalosporins, and in contrast, to increased  
27 susceptibility to both cationic and anionic detergents. YdgH is highly conserved throughout the  
28 Enterobacterales, and we observed similar phenotypes in *Escherichia coli* O157:H7 and  
29 *Enterobacter cloacae* mutants. YdgH is predicted to localize to the periplasm and we speculate  
30 that it may be involved there in cell envelope homeostasis. Collectively, our findings provide  
31 insight into chromosomal mediators of antibiotic resistance in *S. marcescens* and will serve as a  
32 resource for further investigations of this important pathogen.

33 **Introduction:**

34 *Serratia marcescens*, a member of the order Enterobacterales, was historically regarded as an  
35 environmental bacterium with low inherent pathogenicity (1, 2). However, over the past 50  
36 years it has been increasingly recognized as an important cause of invasive infections (3). *S.*  
37 *marcescens* can transiently colonize the gastrointestinal tract and skin, and is a frequent cause  
38 of sporadic healthcare-associated pneumonia, urinary tract and bloodstream infections (4–7).  
39 Because *S. marcescens* is commonly isolated from tap water (3) and clinical isolates frequently  
40 have high nucleotide identity to environmental isolates, it is thought that many infections result  
41 from sporadic exposures (8). However, since many isolates produce tenacious biofilms (9) and  
42 can have intrinsic resistance to common biocides (10, 11), it also causes hospital outbreaks (12),  
43 either through hand hygiene lapses or from a contaminated point source (13, 14). These  
44 outbreaks particularly affect vulnerable patients in adult and neonatal intensive care units (15,  
45 16).

46 Antibiotic resistance (especially intrinsic resistance) is another crucial factor that allows  
47 *S. marcescens* to colonize hospital environments and infect vulnerable hosts. *S. marcescens* is  
48 intrinsically resistant to polymyxins (17, 18) and often has elevated minimal inhibitory  
49 concentrations (MICs) to tetracyclines, macrolides, nitrofurantoin, and fosfomycin (19).  
50 Importantly, *S. marcescens* also encodes a chromosomal Ambler class C beta-lactamase, AmpC,  
51 which at basal levels imparts resistance to penicillins and early generation cephalosporins (19).  
52 However, when treated with beta-lactams, *S. marcescens* clones with mutational derepression  
53 are selected, leading to overexpression of AmpC, which when expressed at high levels, can also  
54 impart resistance to late generation cephalosporins (20, 21). Disturbingly, there have also been

55 increasing reports of dissemination of *S. marcescens* clones containing a mobilizable  
56 chromosomal genomic island (22) containing the class D beta-lactamase, SME, which efficiently  
57 hydrolyzes carbapenems (23–26). Infections with isolates that combine high-level expression of  
58 both AmpC and SME have been described (27); widespread dissemination of such highly beta-  
59 lactam resistant clones, on the background of fluoroquinolone non-susceptibility rates as high  
60 as 20% (<https://sentry-mvp.jmilabs.com/>) would leave clinicians to choose among only the  
61 most expensive and toxic, last-line treatment options.

62 To comprehensively identify loci that contribute both to basal growth and to antibiotic  
63 susceptibility in *S. marcescens*, here we use transposon insertion site sequencing (TIS)  
64 mutagenesis, a powerful approach that couples transposon mutagenesis with DNA sequencing.  
65 In TIS, a library of mutants is created where each bacterial cell harbors a transposon randomly  
66 inserted into the genome. Transposon insertions typically result in loss of function mutants, and  
67 in a high density library, genes for which transposon-insertion mutants are absent or  
68 underrepresented in the library are often critical for growth *in vitro* (sometimes termed  
69 “essential” genes). These genes may be potential antibiotic targets.

70 The library can additionally be subjected to biologically relevant conditions, and  
71 analyzing the abundance of mutants before and after exposure can identify genes that  
72 contribute to pathogen fitness in said condition. Mutants that are underrepresented after  
73 exposure to a condition of interest correspond to loci important for survival under that  
74 condition (29). This approach has facilitated rapid genome-scale identification of genes that  
75 contribute to phenotypes of interest (28), such as to identify genes that alter fitness in *ex vivo*  
76 and *in vivo* models of infection (30, 31), to investigate the function of uncharacterized genes

77 (32), and to identify genes that alter antibiotic susceptibility. For example, TIS has identified  
78 novel modifiers of antibiotic susceptibility in many pathogens, including *Pseudomonas*  
79 *aeruginosa* (33), *Mycobacterium tuberculosis* (34), and *Klebsiella pneumoniae* (35).

80 Here, we created a dense transposon library in *S. marcescens* and used TIS to provide  
81 genome-scale insight into genes that contribute to *in vitro* growth as well as modifiers of  
82 cephalosporin and fluoroquinolone susceptibility. These analyses led to the identification of  
83 *ydgH*, a conserved gene that when deleted, leads to decreased cephalosporin susceptibility.

84

## 85 **Results:**

### 86 **Genes contributing to *in vitro* growth of *S. marcescens* ATCC 13880**

87 We began by generating a high density transposon-insertion mutant library in a spontaneous  
88 streptomycin-resistant mutant of *S. marcescens* ATCC 13880, an environmental, non-clinical  
89 isolate that is the type strain for the species. Using a protocol adapted from *Escherichia coli*  
90 (36), we isolated nearly 2 million individual mutant colonies, each containing a genomic  
91 insertion of the mariner-based Himar1 transposon TnSC189 (37). Mariner transposons integrate  
92 at TA dinucleotides; the resulting pooled library included insertions at 57% of possible genomic  
93 TA sites. To ensure our library had sufficient complexity to allow subsequent analyses, we  
94 determined the percent of possible insertions achieved per gene. As expected for a high  
95 complexity library (28), a histogram of the resulting percentages revealed a bimodal  
96 distribution with a minor peak consisting of genes tolerating relatively few insertions and a  
97 major peak of disrupted genes centered around 70% TA site disruption (Figure 1A). Of the 4363

98 *S. marcescens* genes annotated, 4138 (94.8%) were isolated with at least one insertion. This  
99 allowed us to perform a comprehensive analysis of genes involved in *in vitro* growth of *S.*  
100 *marcescens*.

101 Using a previously developed pipeline that uses hidden Markov model-based analysis of  
102 insertions (38), we grouped genes into three categories: neutral, domain, and  
103 underrepresented. Neutral genes, such as *entE*, which synthesizes the siderophore  
104 enterobactin, may be crucial under certain physiologic conditions, but *in vitro*, tolerate  
105 transposon insertion throughout the span of the gene and are dispensable for growth  
106 (Supplemental Figure 1A, left). In contrast, underrepresented genes (often referred to as  
107 “essential” genes) such as *purA*, encoding the adenylosuccinate synthetase involved in purine  
108 metabolism, can sustain insertions at few or no sites while still allowing growth (Supplemental  
109 Figure 1A, middle). Finally, “domain” genes, such as *heliD*, encoding a DNA helicase involved in  
110 unwinding of duplex DNA, can be found with insertions in certain domains or regions of the  
111 gene, but not others (Supplemental Figure 1A, right).

112 By this analysis, out of the 4363 *S. marcescens* genes annotated, we identified 483  
113 underrepresented for growth in LB, and an additional 104 domain genes (Supplemental Table  
114 1). The remaining 3776 genes were classified as neutral. Compared to a prior analysis in *S.*  
115 *marcescens*, we identified fewer genes as “essential” for *in vitro* growth, though a strict  
116 comparison is difficult since this prior effort used a clinical strain and utilized a low-density  
117 library with 32,000 unique insertion mutants (31, 39). Binning by cluster of orthologous gene  
118 (COG) functional category revealed that as expected, the most frequent categories for  
119 underrepresented genes were for core cellular processes such as translation (including many

120 tRNA synthetases and ribosomal proteins), cell envelope biogenesis (including enzymes  
121 involved in peptidoglycan and lipopolysaccharide synthesis (LPS)), and coenzyme metabolism  
122 (including enzymes involved in central metabolism) (Supplemental Table 1). These categories  
123 are common for essential genes in other organisms (40).

124 *S. marcescens* was formerly classified as a member of the *Enterobacteriaceae*, but  
125 modern genome-based phylogenetics has re-assigned *Serratia* species into the sister  
126 *Yersiniaceae* family. We were eager to identify both underrepresented genes shared between  
127 *S. marcescens* and the common model *E. coli* lab strain, *E. coli* K-12, as well as those specific to  
128 *S. marcescens*, and so compared those identified here to those previously identified using the  
129 same approach in *E. coli* K-12 (36), as well as to those identified in *E. coli* K-12 using single gene  
130 knockouts (the “KEIO” collection described in (41)). Emphasizing the conserved physiology  
131 across the order Enterobacterales, of the 463 underrepresented genes we identified in *S.*  
132 *marcescens* that were also identified in *E. coli* (with an E value of  $1 \times 10^{-10}$  and percentage  
133 identity >30%), 412 (89%) (Figure 1B) were also underrepresented in *E. coli* K-12 by transposon  
134 insertion; of the 299 genes in *E. coli* K-12 identified as essential by single gene knockout that  
135 were also identified in *S. marcescens*, 264 (88%) were also underrepresented by our analysis  
136 (Figure 1B).

137 Genes underrepresented in *S. marcescens* (but not in *E. coli* K-12) ( $n = 49$ , Supplemental  
138 Table 2) were most commonly assigned to COG functional categories including cell envelope  
139 biogenesis (9 genes), transcription (7 genes), and carbohydrate metabolism and transport (6  
140 genes) (Figure 1C). Additional investigation of these genes may identify divergent biology in *S.*  
141 *marcescens* that could be targets for novel narrow-spectrum antimicrobials. An intriguing

142 example involves the lipid A 4-amino-4-deoxy-L-arabinose (Ara4N) modification (*arn*) operon. In  
143 *Enterobacteriaceae* as well as in *Pseudomonas aeruginosa*, this operon, when upregulated by  
144 PhoP/PhoQ, can lead to decreased susceptibility to cationic polypeptides like polymyxins by  
145 addition of positively charged Ara4n moieties to lipid A (42). In *S. marcescens*, which is known  
146 to be intrinsically resistant to polymyxins through *arn* (17), we detected an absence of  
147 insertions in *arnD*, *arnE*, and *arnF* (Figure 1D).

148 In addition to the *arn* operon described above, compared to *E. coli* K-12, we also found  
149 that two of the three components of the AcrAB-TolC RND family multidrug efflux pump were  
150 underrepresented in *S. marcescens* ATCC 13880. *mlaE*, which encodes the inner membrane  
151 permease component that facilitates transport of cell membrane lipids between the inner and  
152 outer membranes was underrepresented as well (Supplemental Table 2) (43). Components of  
153 peptidoglycan recycling are also underrepresented in *S. marcescens* (compared to *E. coli* K-12),  
154 including *nlpD*, which serves to activate cell wall amidases which act in daughter cell separation  
155 (44), and *murQ*, encoding a component of the cytoplasmic peptidoglycan recycling machinery  
156 (45).

### 157 **Antibiotic screen in *S. marcescens* ATCC 13880**

158 We then subjected our high-density insertion library to antibiotics with the goal of discovering  
159 novel loci that modify antibiotic susceptibility. We focused our initial efforts herein on  
160 cephalosporins and fluoroquinolones as they are the antibiotic classes with fastest worldwide  
161 growth in consumption (46) and are currently clinically useful against serious *S. marcescens*  
162 infections (20, 47). Within the cephalosporins, we chose cefoxitin, an early generation



163 cephalosporin that is readily hydrolyzed by the AmpC beta-lactamase and to which *S.*  
164 *marcescens* is relatively resistant, and cefepime, a late-generation cephalosporin that is  
165 negligibly hydrolyzed by AmpC and to which *S. marcescens* is relatively susceptible (21). We  
166 chose ciprofloxacin as among the fluoroquinolones, its MICs are typically lowest for *S.*  
167 *marcescens* (<https://sentry-mvp.jmilabs.com/>) (Figure 2A). We performed this screen at sub-  
168 MIC concentrations that over the course of the treatment resulted in  $\leq 10$ -fold decrease in CFU  
169 (Figure 2B, Supplemental Figure 1B); this preserved library diversity so that when we sequenced  
170 the resulting libraries, we could identify enough TA insertion mutants per gene to allow us to  
171 identify genes that had small as well as large effects on growth and survival (28). Sequencing  
172 the resulting libraries allowed us to identify genes that when mutated by transposon insertion  
173 (presumably resulting in null or hypofunction) led to depletion or enrichment of that mutant  
174 when exposed to antibiotic. Genes with fewer insertion-mutants (depleted) represent  
175 candidate loci that support resistance, whereas genes with more abundant insertion-mutants  
176 (enriched) represent genes that may support susceptibility. As expected, under screen  
177 conditions, we measured robust induction of AmpC by cefoxitin (Supplemental Figure 1C) (21).

178         Compared to outgrowth of the input library in no antibiotic, we found 57, 39, and 39  
179 genes enriched and 161, 113, and 152 genes depleted in cefoxitin, cefepime, and the  
180 fluoroquinolone ciprofloxacin, respectively (with  $p$ -value  $\leq 0.01$  and  $\geq 4$ -fold change in  
181 abundance) (Figure 2C, 2D). Many of the genes depleted in ciprofloxacin act in pathways  
182 related to the mechanism of action of fluoroquinolone antibiotics including those involved in  
183 DNA replication (such as *holE*) and DNA damage repair (such as *recD*, *recG*, and *xseA*),  
184 supporting the validity of our approach (Supplemental Figure 1D, Supplemental Table 3) (48,

185 49). Similarly, we identified many genes depleted in cefepime related to peptidoglycan  
186 homeostasis (such as *nlpD*, *pbpG*, *slt*, and *dacA*) and envelope integrity (such as *nlpA*)  
187 (Supplemental Figure 1E, Supplemental Table 3) (50).

188 As we would predict, in all 3 antibiotics we identified enrichment in insertion mutants in  
189 *ompF*, encoding an outer membrane porin that facilitates the permeation of cephalosporins  
190 and hydrophilic fluoroquinolones like ciprofloxacin (Supplemental Table 3) (51–53). All 3 also  
191 had enrichment of *lonP*, encoding a key bacterial serine protease whose deletion has been  
192 shown to lead to increased efflux of diverse antibiotics (54, 55). Interestingly, we also found  
193 enrichment in cefoxitin, cefepime, and ciprofloxacin in the setting of *slyA* insertion. SlyA is a  
194 member of the MarR family of transcriptional regulators known to be activated by small  
195 molecules; it is activated by salicylate and its best characterized role seems to be as a counter-  
196 silencer, alleviating H-NS-mediated repression (56). It has a diverse regulon (57), but has not  
197 previously been reported to be involved in regulation of antibiotic susceptibility. Further study  
198 is needed to characterize this and other genes we have identified (Figure 2D, Supplemental  
199 Table 3) in which insertion leads to coordinate depletion or enrichment in multiple antibiotics.

## 200 **Modifiers of cefoxitin susceptibility**

201 To better understand modifiers of intrinsic resistance in *S. marcescens*, we focused our  
202 attention on modifiers of cefoxitin susceptibility, to which basal AmpC levels provide some  
203 baseline resistance. Of the 161 genes significantly depleted in cefoxitin (Figure 3A), we  
204 identified many predicted to participate in peptidoglycan homeostasis such as multiple  
205 membrane-bound lytic murein transglycosylases (*mltC*, *mltD*, and *mltF*), as well as penicillin-

206 binding protein 1B (*mrcB*) and dihydrodipicolinate synthase (*dapA*) (Figure 3B). Importantly,  
207 mutants in *ampC* were also depleted, while we saw enrichment in mutants in the N-  
208 acetylmuramoyl-L-alanine amidase paralog that we have previously denoted as *amiD2* and  
209 suggested may be the most important for AmpC derepression in *S. marcescens* (58).

210       Toward our aim of discovering novel modifiers of ceftiofur susceptibility, we specifically  
211 focused on genes in which insertion mutants were exclusively enriched or depleted in ceftiofur  
212 (and not also in cefepime and/or ciprofloxacin). We constructed in-frame deletions in 5 largely  
213 uncharacterized loci identified in our screen that were depleted (*mppA*, *oppBF*, *yeyU*, *yeeF*, and  
214 *yhcS*), and in one locus (*ydgH*), which was enriched. We compared the growth of the mutants in  
215 ceftiofur to that of wild-type *S. marcescens* ATCC 13880 in ceftiofur in a separate test tube. We  
216 used  $\Delta ampC$  as a control. The final CFU ratio expressed as  $CFU_{mutant}/CFU_{wildtype}$  is also corrected  
217 for any minor differences in growth that were observed in mutants in LB alone. CFU were  
218 determined after both 3 and 6 hours in ceftiofur (at the same concentration as used in the  
219 screen).

220       As expected, we observed a large progressive decrease in the CFU ratio in  $\Delta ampC$   
221 (Figure 3C). We also observed less pronounced but significant decreases in CFU ratios at 6 hours  
222 in  $\Delta mppA$  and a mutant with a deletion of the entire *opp* operon,  $\Delta oppBF$  (*oppB*, *oppC*, and  
223 *oppF* were all depleted in the screen). In contrast, deletions of *yeyU*, *yeeF*, and *yhcS*, in which  
224 insertions were depleted in our pooled screen, did not have reduced CFU ratios when these  
225 single gene deletions mutants were tested in isolation (Figure 3C).

226  **$\Delta ydgH$  has decreased susceptibility to ceftiofur**

227 *ydgH*, which was enriched in the screen, had a large increase in CFU ratio at 3 hours of cefoxitin  
228 (Figure 3C). *ydgH* was originally identified through proteomic analyses as encoding a possible  
229 secreted effector in *Salmonella enterica*; however, YdgH was only detected in low abundance in  
230 samples from mutants deleted for a type III secretion system regulatory protein (and not in  
231 wild-type samples) (59). Efforts to identify cognate eukaryotic targets were unsuccessful (60).

232 In *S. marcescens* ATCC 13880, *ydgH* is predicted to encode a 951 amino acid protein.  
233 *ydgH* is upstream of the *ydgI* gene, which is predicted, by similarity to *P. aeruginosa* ArcD, to  
234 encode a putative arginine:ornithine antiporter (61). It is unlikely that *ydgH* and *ydgI* are part of  
235 an operon, as we identified high confidence  $\sigma^{70}$  promoters 5' to both open reading frames as  
236 well as a transcriptional terminator 3' to *ydgH* (Supplemental Figure 2) (62, 63). Furthermore,  
237 in contrast to *ydgH*, which contained enrichment of insertions throughout the gene in our TIS,  
238 there was no enrichment of insertions in *ydgI* (Figure 4A).

239 We observed that  $\Delta ydgH$  had significantly higher CFU than Wt across a range of  
240 cefoxitin concentrations at both 2 and 4 hours, but grew indistinguishably from Wt in the  
241 absence of cefoxitin (Figure 4B). We noticed smaller relative differences between  $\Delta ydgH$  and  
242 Wt at later time points in these experiments, as well as those in Figure 3C, perhaps due either  
243 to compensatory upregulation of AmpC (at lower cefoxitin concentrations) or to delayed killing  
244 (at higher cefoxitin concentrations).

245 To enable higher-throughput screening of other compounds by spectrophotometry, for  
246 subsequent experiments, we used the OD<sub>600</sub> ratio of  $\Delta ydgH$  to Wt (as depicted in Figure 4C). We  
247 first used this approach to confirm that absence of *ydgH* was necessary and sufficient to confer

248 enhanced growth in cefoxitin. *ΔydgH* was transformed with either empty pBAD33 or pBAD33  
249 containing the *ydgH* open reading frame; we observed that pBAD33-*ydgH* rescued the cefoxitin  
250 phenotype but the empty vector did not (Figure 4D).

### 251 ***ΔydgH* has increased susceptibility to detergents**

252 To identify if *ydgH* modifies susceptibility to other antibiotics, and to acquire initial clues to its  
253 function, we assayed the susceptibility of *ΔydgH* to a range of antibiotics and detergents. For  
254 many compounds tested, there was a narrow concentration range that was sufficiently  
255 inhibitory to allow us to assay for potential effects. To enhance the accessibility of this large  
256 data set, we present the spectrophotometric ratio in the main text figures and the growth  
257 curves from which they are derived in the supplemental figures. The complete data at all  
258 concentrations tested are in Supplemental Table 4.

259 We began with beta-lactams; we found that in addition to the 2<sup>nd</sup> generation  
260 cephalosporin cefoxitin, *ΔydgH* also had significant reductions in susceptibility to the 3<sup>rd</sup>  
261 generation cephalosporins moxalactam and ceftriaxone but not to the 1<sup>st</sup> generation  
262 cephalosporin cephalexin or the anti-Pseudomonal cephalosporins cefepime or ceftazidime  
263 (Figure 5A, Supplemental Figure 3). There was not a prominent phenotype in the penicillins  
264 carbenicillin or piperacillin, or the carbapenems imipenem or meropenem (Figure 5A,  
265 Supplemental Figure 4). These distinct phenotypes are not attributable to differences in  
266 inherent susceptibilities to the assayed antibiotics, as the 3<sup>rd</sup> generation cephalosporins, in  
267 which the mutant had phenotypes, and the anti-Pseudomonal cephalosporins, in which the  
268 mutant did not, were active across similar concentration ranges in *S. marcescens* ATCC 13880

269 (Supplemental Table 4). We hypothesized that the differences seen between the beta-lactams  
270 might be attributable to their being differential substrates for AmpC, but *ΔydgH* did not have  
271 different AmpC activity compared to Wt (Supplemental Figure 4E).

272 In contrast to the differential phenotypes observed with different beta-lactam  
273 antibiotics, we did not see a strong effect in antibiotics with cytoplasmic targets such as  
274 ciprofloxacin, trimethoprim, gentamicin, and chloramphenicol (Figure 5B, Supplemental Figure  
275 5), nor to antimicrobials to which *S. marcescens* has high intrinsic resistance, such as bacitracin,  
276 and polymyxin B (Figure 5C, Supplemental Figure 6). Intriguingly, in contrast to the decreased  
277 susceptibility observed with 2<sup>nd</sup> and 3<sup>rd</sup> generation cephalosporins, we observed small, but  
278 significant *increased* susceptibility of the *ΔydgH* mutant (compared to Wt) to rifampin, and  
279 more broadly to detergents including the anionic detergent sodium dodecyl sulfate (SDS), as  
280 well as the cationic detergents benzalkonium chloride and benzethonium chloride (Figure 5C,  
281 Supplemental Figure 6).

## 282 **Conservation within Enterobacterales**

283 To gain further insight into this relatively uncharacterized gene, we performed a phylogenetic  
284 analysis and discovered that *ydgH* is closely conserved among the Enterobacterales (but not in  
285 other Gram-negatives) (Figure 6A). As expected, *S. marcescens* YdgH has greatest similarity to  
286 homologs identified in other *Yersiniaceae*, followed by the closely related sister families  
287 *Hafniaceae* and *Erwiniaceae*, followed by the more distantly related *Enterobacteriaceae*. We  
288 hypothesized that if the function of YdgH was conserved, we would observe similar phenotypes  
289 in distantly related Enterobacterales. To test this idea, we constructed in-frame deletions of

290 *ydgH* in the pathogens *E. coli* O157:H7 EDL933 and *Enterobacter cloacae* ATCC 13047, and  
291 assayed the resulting mutants in ceftriaxone, to which *S. marcescens*  $\Delta ydgH$  had decreased  
292 susceptibility, and in benzethonium chloride and SDS, to which *S. marcescens*  $\Delta ydgH$  had  
293 increased susceptibility. We used ceftriaxone for these assays since *E. cloacae* has high-level  
294 intrinsic resistance to ceftioxin.

295 We observed broadly consistent results, with *E. coli* O157:H7  $\Delta ydgH$  having similar  
296 phenotypes in ceftriaxone and benzethonium chloride (though not SDS), and *E. cloacae*  $\Delta ydgH$   
297 having similar phenotypes in benzethonium chloride and SDS (though with only a small  
298 difference in ceftriaxone) (Figure 6B).

299

### 300 **Discussion:**

301 Here, we present a genome-scale analysis of the essential genome of the type strain of *S.*  
302 *marcescens*, a medically important nosocomial pathogen. We report a curated resource of  
303 genes that alter susceptibility to beta-lactams and fluoroquinolones, arguably the two most  
304 useful antibiotic classes for treatment of *S. marcescens* infections. And, we validate and  
305 characterize *ydgH*, a largely uncharacterized gene conserved in the Enterobacterales, which  
306 when deleted leads to decreased susceptibility to 2<sup>nd</sup> and 3<sup>rd</sup> generation cephalosporins but  
307 increased susceptibility to ionic detergents.

308 A striking feature of the underrepresented genes we identified here in *S. marcescens*  
309 ATCC 13880 (compared to *E. coli* K-12) is their involvement in envelope biogenesis and  
310 homeostasis. These genes are involved in multiple structural and functional compartments

311 including in LPS modification (*arnD*, *arnE*, and *arnF*), phospholipid transport (*mlaE*), as well as  
312 peptidoglycan regulation (*murQ* and *nlpD*). These results hint at potentially important  
313 differences in *S. marcescens* and *E. coli* envelope physiology. It is known that in addition to the  
314 higher Ara4N content in Lipid A in *S. marcescens*, it also possesses additional core  
315 oligosaccharide substitutions (64, 65). We anticipate that further genetic investigations,  
316 including additional TIS to identify underrepresented genes in other relatively neglected  
317 Enterobacterales, as well as more detailed bioinformatic analyses using additional comparators,  
318 will suggest additional divergence in envelope biology, potentially enabling the development of  
319 narrow-spectrum antibiotics or antibiotic-adjuvants.

320         The high-density library we created should be a useful resource for investigation of  
321 other clinically-relevant phenotypes in *S. marcescens*. This approach has recently allowed  
322 identification of genes that facilitate bacteremia and the production of hemolysins in clinical  
323 strains of this pathogen (31, 66). Additional phenotypes crucial for pathogenesis, such as  
324 immune system evasion, biofilm formation, and colonization of target organs such as the  
325 bladder and lungs, will be of interest. The data set that we have generated here on  
326 cephalosporin- and fluoroquinolone-modifying genes should also serve as an important  
327 resource facilitating future investigations. Genome-scale antibiotic screens are an important  
328 addition to classical selection screens and sequencing of resistant clinical isolates because they  
329 can identify genes, such as *ydgH*, that regulates antibiotic susceptibility yet are not commonly  
330 seen clinically (perhaps due to conditional tradeoffs in fitness, like we identify here).

331         Our initial characterization of *ydgH* suggests that it does not act directly through the  
332 beta-lactamase AmpC; we show here that beta-lactamase activity is not increased in the  $\Delta ydgH$



333 mutant. The increased susceptibility of  $\Delta ydgH$  to detergents is likely an important clue  
334 regarding its function. YdgH is predicted to localize to the periplasm based on bioinformatic  
335 analysis and proteomics data sets (67, 68) and may in fact be present there in high  
336 concentrations in Enterobacterales (69, 70). One possibility is that in the periplasm, YdgH plays  
337 a role in the maturation of outer membrane-bound biomolecules. In support of this  
338 speculation, overexpression of *micA*, a small RNA that is a primary effector of the  $\sigma^E$  envelope  
339 stress response, leads to upregulation of *ydgH* (71). Alternatively, its absence may lead to  
340 envelope stress, leading to activation of  $\sigma^E$ . Since downregulation of outer membrane porins  
341 that facilitate the entry of cefoxitin are a prime target of the  $\sigma^E$  response, this could explain  
342 both the increased susceptibility to detergents (and rifampin), and the decreased susceptibility  
343 to cefoxitin (and other cephalosporins particularly dependent on shared outer membrane  
344 porins for their entry).

345         Clearly, further mechanistic studies are needed to uncover the function of *ydgH*, as well  
346 as other genes that we identify here as modifiers of antibiotic susceptibility in *S. marcescens*.  
347 Such work will reveal novel bacterial cell biology as well as potentially tractable new antibiotic  
348 targets.

349

## 350 **Materials and Methods:**

### 351 **Transposon-insertion library construction**

352 Conjugation was performed to transfer pSC189 (37) from *E. coli* SM10 $\lambda$ pir to a spontaneous  
353 streptomycin-resistant mutant of *S. marcescens* ATCC 13880. Prior to conjugation, the two

354 strains were cultured separately overnight in LB + chloramphenicol and LB + streptomycin,  
355 respectively, pelleted and washed twice in LB, resuspended 10-fold in LB, and combined 1:1 for  
356 final volume of 50 uL on a 0.45 um HA filter (Millipore) on an LB agar plate and incubated at  
357 37°C for 1 hour. The filter was then eluted with 750 uL LB, and the filter washed twice more  
358 with 500 uL LB to ensure all transconjugants were eluted. 4 such reactions were then  
359 combined, and plated on 245x245 mm<sup>2</sup> (Corning) LB-agar plates containing chloramphenicol  
360 and streptomycin. After 16 hours incubation at 37°C, colonies were harvested in LB + 25%  
361 glycerol (v/v) and stored at -80°C. This was repeated 3 times generating aliquots of “A,” “B,”  
362 and “C” libraries. The OD of the resulting libraries was measured (after appropriate dilution)  
363 prior to freezing and ranged from 56 to 108.

364

#### 365 **Antibiotic screen**

366 One aliquot each of the above libraries were thawed and combined (in proportion to its OD) in  
367 50 mL of LB to yield a final OD of 3. 1 mL of above was then inoculated in 100 mL LB to roughly  
368 yield a culture with OD 0.03. The resulting culture was incubated with continuous agitation in  
369 500 mL Erlenmeyer flask until OD of 0.1. 20 mL of the above culture was then added to 4-125  
370 mL flasks, either an empty control flask or to flasks containing antibiotic to make a final  
371 concentration of cefoxitin 4 µg/mL, cefepime 0.025 µg/mL, or ciprofloxacin 0.05 µg/mL.  
372 Preparatory experiments had allowed estimation of the resulting CFU, so after 6 hours, to  
373 enable plating of roughly equal number of colonies, 100 µL of the LB culture (after dilution in  
374 LB), 5 mL of the cefoxitin culture (after washing and concentration in LB), and 20 mL of the

375 cefepime and ciprofloxacin cultures (after washing and concentration in LB) were plated on LB  
376 agar without antibiotics. Surviving colonies were allowed to grow for 16 hours incubation at  
377 37°C before colonies were harvested and stored as above. To determine beta-lactamase activity  
378 under screen conditions, samples from 2, 4, and 6 hours after incubation with antibiotic were  
379 taken, essentially as above except that a single aliquot of the “A” library was thawed rather  
380 than the 3 libraries combined. At the appropriate time points, a 1 mL aliquot was taken,  
381 pelleted at 13k RCF for 5 minutes at room temperature, resuspended in 1 mL 50 mM NaPO<sub>4</sub>  
382 (pH 7) buffer, and flash frozen in liquid nitrogen and stored at -80 °C. After thawing, samples  
383 were lysed on ice using a Sonic Dismembrator with one pulse of 10 seconds on setting 8.  
384 Samples were clarified at 4°C 21k RCF for 10 minutes and the supernatants transferred to new  
385 tubes. Qbit protein assay (Invitrogen) was used to determine protein concentrations. 1 µg of  
386 total protein was added to 7.8 nmol nitrocefin (Sigma) and absorbance at 495 nm measured  
387 kinetically for 10 minutes at room temperature. The slope of the line from the first 5 data  
388 points was used to measure beta-lactamase activity (with 1 unit of activity representing  
389 hydrolysis of 1 µmole of nitrocefin per minute). Activity is expressed per gram of clarified  
390 lysate. AmpC is the only beta-lactamase identified in *S. marcescens* ATCC 13880 and  $\Delta ampC$   
391 mutants have essentially no beta-lactamase activity so beta-lactamase activity accurately  
392 represents AmpC activity. For the assay of AmpC activity in  $\Delta ydgH$  to allow greater accuracy of  
393 a sample with lower relative activity, 2 µg of similarly obtained and processed mid-logarithmic  
394 samples were assayed.

395

## 396 **Characterization of transposon-insertion libraries**

397 Libraries were prepared essentially as described in Warr et al (36). Prior to sequencing using a  
398 MiSeq V3 cartridge, equimolar DNA fragments for the original harvested library, and the  
399 resulting libraries after growth in LB alone, cefoxitin, cefepime, and ciprofloxacin were pooled  
400 after addition of barcodes to allow multiplexing. After trimming, reads were mapped, using  
401 Bowtie, allowing 1 mismatch, to the *S. marcescens* ATCC 13880 genome deposited below.  
402 Reads that mapped to multiple sites were randomly distributed between them. For analysis of  
403 underrepresented, domain, and neutral genes, EL-ARTIST was used after above. Artemis was  
404 used to generate TA insertion plots in Figures 1 and 4. Con-ARTIST was used to analyze  
405 conditional enrichment or depletion of transposon-insertion mutants, comparing the original  
406 input library to the library obtained after outgrowth in LB alone, cefoxitin, cefepime, and  
407 ciprofloxacin; these data are in Supplemental table 3. Genes conditionally depleted or enriched  
408 in antibiotics were compared to those conditionally depleted or enriched in the library  
409 outgrown in LB alone and if the original p-value was  $\leq 0.01$  and the adjusted fold-change  $\geq 4$ ,  
410 deemed significant. The “volcano” plots in Figure 3 and Supplemental Figure 1 are generated in  
411 this way. BioVenn was used to compare sets of conditionally enriched and depleted genes  
412 between antibiotic and between *S. marcescens* and *E. coli* K-12 data sets and to illustrate the  
413 results (72). Microsoft Excel was used to generate tables. Graphpad Prism was used to depict all  
414 remaining data.

415

416 **Molecular biology**

417 Allelic exchange using pTOX3 was used to make all in-frame deletions (58) including *mppA*  
418 (WP\_033640165.1), *oppB* (WP\_004932150.1), *oppC* (WP\_004932149.1), *oppD*  
419 (WP\_016927496.1), *oppF* (WP\_004932143.1), *yeiU* (WP\_033639836.1), *yeeF*  
420 (WP\_004935642.1), *yhcS* (WP\_016929157.1), *ydgH* (WP\_033640181.1), and *ampC*  
421 (WP\_033640466.1) all in *S. marcescens* ATCC 13880, as well as *ydgH* in *E. coli* O157:H7 EDL933  
422 (WP\_000769322.1) and *Enterobacter cloacae* ATCC 13047 (WP\_013096870.1). pTOX3-  
423 derivative vectors were constructed essentially as described. Primer sequences are in  
424 Supplemental Table 5. Restriction enzyme-cut pTOX3 was incubated with purified AB and CD  
425 PCR products along with a half-reaction of HiFi DNA Assembly Master Mix (NEB) according to  
426 manufacturer's directions. Reaction products were routinely desalted using "lily pad dialysis"  
427 (the entire above reaction volume placed on a slowly rotating 0.05 um HA filter (Millipore)  
428 floating on the surface of a MilliQ water) and subsequently electroporated directly into  
429 electrocompetent donor strains *E. coli* MFD $\lambda$ pir or SM10 $\lambda$ pir. Selection and counter-selection  
430 were performed after (58). Deletion mutants were identified by colony PCR with subsequent  
431 Sanger sequencing of the reaction products. Primers used for construction of pBAD33-*ydgH* are  
432 in Supplemental Table 5. pBAD33-*ydgH* or pBAD33 were electroporated into  $\Delta$ *ydgH* after (73).  
433 To ensure sufficient expression of YdgH,  $\Delta$ *ydgH* pBAD33-*ydgH* (and empty vector) were induced  
434 in arabinose 1% (v/v) for 4 hours in mid-log phase prior to back-dilution and incubation with  
435 cefoxitin (or vehicle). To allow for confirmation of expression, a FLAG tag was cloned into the C-  
436 terminus. The YdgH phylogeny was constructed based on amino acid substitutions by using the  
437 Maximum Likelihood method and JTT matrix-based model in MEGA-X (74, 75).  
438

439 ***ΔydgH* chemical screen**

440 Growth curves to identify phenotypes in *ΔydgH* were performed using the indicated  
441 concentration of chemical (Sigma) in microplate format (Bioscreen C growth plate reader) using  
442 constant shaking setting at 37°C. Antibiotics were dissolved as recommended by the Clinical  
443 and Laboratory Standards Institute (CLSI) and stored in small aliquots at -80°C for up to 3  
444 months.

445

446 **Data availability**

447 *S. marcescens* ATCC 13880 was obtained from ATCC and a spontaneous streptomycin-resistant  
448 mutant isolated on LB + streptomycin 1000 ug/mL. This mutant grew indistinguishably from  
449 wild-type in the absence of streptomycin. DNA was isolated as directed using Qiagen DNeasy  
450 Plant Mini Kit and submitted to the University of Massachusetts Medical School Deep  
451 Sequencing Core which performed de novo assembly using PacBio sequencing and closed and  
452 finished using HGAP. The resulting genome, obtained from the core, was manually polished  
453 using Illumina reads and deposited (Accession number: CP072199). It is 99.93% identical to  
454 CP041233.1, which was not available at the at the time of sequencing. *S. marcescens* ATCC  
455 13880 genes were identified using the BASys pipeline (incorporating Glimmer) and manually  
456 polished (76). The subsequent gene list was used to generate the look up table incorporated  
457 into EL-ARTIST and Con-ARTIST pipelines above. To ensure the accuracy of homology  
458 identification, for those *S. marcescens* identified as underrepresented, a translated protein  
459 BLAST was used to identify *E. coli* K-12 homologs and results manually adjudicated. COG

460 categories for appropriate genes of interest were identified in the Database of Cluster of  
461 Orthologous Genes and manually tabulated (77). Reads for all sequenced libraries have been  
462 deposited in GEO (Accession number: GSE169651). UniProt and EcoCyc were frequently used to  
463 glean initial functional and sequence data about a particular gene product (78, 79). All statistics  
464 performed on processed data, depicted in figures were with an unpaired two-tailed  $t$  test. No  
465 correction for multiple comparisons were made. Significance asterisks are \* for  $p \leq 0.05$  and \*\*  
466 for  $p \leq 0.01$ . The *ydgH* gene schematic was constructed in Benchling using predicted sigma-70  
467 promoter regions with a score  $> 90$  in bacPP (62). Rho-independent terminators were identified  
468 using ARNold (63).

469

#### 470 **Acknowledgements:**

471 We wish to thank members of the Waldor lab including Brandon Sit, Carole Kuehl and Troy  
472 Hubbard for helpful discussion. JEL has been supported by T32 AI-007061, the Harvard Catalyst  
473 Medical Research Investigator Training fellowship, and K08 AI-155830. MKW is supported by  
474 R01-AI-042347 and by the Howard Hughes Medical Institute.

475

#### 476 **References:**

477 1. Yu VL. 1979. *Serratia marcescens*: historical perspective and clinical review. *N Engl J Med*  
478 300:887–893.

- 479 2. Adeolu M, Alnajjar S, Naushad S, S Gupta R. 2016. Genome-based phylogeny and taxonomy  
480 of the “Enterobacteriales”: proposal for Enterobacterales ord. nov. divided into the  
481 families Enterobacteriaceae, Erwiniaceae fam. nov., Pectobacteriaceae fam. nov.,  
482 Yersiniaceae fam. nov., Hafniaceae fam. nov., Morganellaceae fam. nov., and Budviciaceae  
483 fam. nov. *Int J Syst Evol Microbiol* 66:5575–5599.
- 484 3. Mahlen SD. 2011. *Serratia* infections: from military experiments to current practice. *Clin*  
485 *Microbiol Rev* 24:755–791.
- 486 4. Sligl W, Taylor G, Brindley PG. 2006. Five years of nosocomial Gram-negative bacteremia in  
487 a general intensive care unit: epidemiology, antimicrobial susceptibility patterns, and  
488 outcomes. *Int J Infect Dis* 10:320–325.
- 489 5. Wisplinghoff H, Bischoff T, Tallent SM, Seifert H, Wenzel RP, Edmond MB. 2004.  
490 Nosocomial bloodstream infections in US hospitals: analysis of 24,179 cases from a  
491 prospective nationwide surveillance study. *Clin Infect Dis* 39:309–317.
- 492 6. Koenig SM, Truwit JD. 2006. Ventilator-associated pneumonia: diagnosis, treatment, and  
493 prevention. *Clin Microbiol Rev* 19:637–657.
- 494 7. Weiner LM, Webb AK, Limbago B, Dudeck MA, Patel J, Kallen AJ, Edwards JR, Sievert DM.  
495 2016. Antimicrobial-Resistant Pathogens Associated With Healthcare-Associated  
496 Infections: Summary of Data Reported to the National Healthcare Safety Network at the  
497 Centers for Disease Control and Prevention, 2011-2014. *Infect Control Hosp Epidemiol*  
498 37:1288–1301.



- 499 8. Sandner-Miranda L, Vinuesa P, Cravioto A, Morales-Espinosa R. 2018. The Genomic Basis  
500 of Intrinsic and Acquired Antibiotic Resistance in the Genus *Serratia*. *Front Microbiol* 9:828.
- 501 9. Ray C, Shenoy AT, Orihuela CJ, González-Juarbe N. 2017. Killing of *Serratia marcescens*  
502 biofilms with chloramphenicol. *Ann Clin Microbiol Antimicrob* 16:19.
- 503 10. Langsrud S, Møretrø T, Sundheim G. 2003. Characterization of *Serratia marcescens*  
504 surviving in disinfecting footbaths. *J Appl Microbiol* 95:186–195.
- 505 11. de Frutos M, López-Urrutia L, Domínguez-Gil M, Arias M, Muñoz-Bellido JL, Eiros JM,  
506 Ramos C. 2017. *Serratia marcescens* outbreak due to contaminated 2% aqueous  
507 chlorhexidine. *Enferm Infecc Microbiol Clin* 35:624–629.
- 508 12. Moradigaravand D, Boinett CJ, Martin V, Peacock SJ, Parkhill J. 2016. Recent independent  
509 emergence of multiple multidrug-resistant *Serratia marcescens* clones within the United  
510 Kingdom and Ireland. *Genome Res* 26:1101–1109.
- 511 13. Merino JL, Bouarich H, Pita MJ, Martínez P, Bueno B, Caldés S, Corchete E, Jaldo MT,  
512 Espejo B, Paraíso V. 2016. *Serratia marcescens* bacteraemia outbreak in haemodialysis  
513 patients with tunnelled catheters due to colonisation of antiseptic solution. Experience at  
514 4 hospitals. *Nefrologia* 36:667–673.
- 515 14. Novosad SA, Lake J, Nguyen D, Soda E, Moulton-Meissner H, Pho MT, Gualandi N, Bepo L,  
516 Stanton RA, Daniels JB, Turabelidze G, Van Allen K, Arduino M, Halpin AL, Layden J, Patel  
517 PR. 2019. Multicenter Outbreak of Gram-Negative Bloodstream Infections in Hemodialysis  
518 Patients. *Am J Kidney Dis* <https://doi.org/10.1053/j.ajkd.2019.05.012>.

- 519 15. Regev-Yochay G, Smollan G, Tal I, Pinas Zade N, Haviv Y, Nudelman V, Gal-Mor O, Jaber H,  
520 Zimlichman E, Keller N, Rahav G. 2018. Sink traps as the source of transmission of OXA-48-  
521 producing *Serratia marcescens* in an intensive care unit. *Infect Control Hosp Epidemiol* 1–  
522 9.
- 523 16. Cristina ML, Sartini M, Spagnolo AM. 2019. *Serratia marcescens* Infections in Neonatal  
524 Intensive Care Units (NICUs). *Int J Environ Res Public Health* 16.
- 525 17. Lin QY, Tsai Y-L, Liu M-C, Lin W-C, Hsueh P-R, Liaw S-J. 2014. *Serratia marcescens* arn, a  
526 PhoP-regulated locus necessary for polymyxin B resistance. *Antimicrob Agents Chemother*  
527 58:5181–5190.
- 528 18. Merkier AK, Rodríguez MC, Togneri A, Brengi S, Osuna C, Pichel M, Cassini MH, *Serratia*  
529 *marcescens* Argentinean Collaborative Group, Centrón D. 2013. Outbreak of a cluster with  
530 epidemic behavior due to *Serratia marcescens* after colistin administration in a hospital  
531 setting. *J Clin Microbiol* 51:2295–2302.
- 532 19. Stock I, Grueger T, Wiedemann B. 2003. Natural antibiotic susceptibility of strains of  
533 *Serratia marcescens* and the *S. liquefaciens* complex: *S. liquefaciens sensu stricto*, *S.*  
534 *proteamaculans* and *S. grimesii*. *Int J Antimicrob Agents* 22:35–47.
- 535 20. Tamma PD, Doi Y, Bonomo RA, Johnson JK, Simner PJ, Antibacterial Resistance Leadership  
536 Group. 2019. A Primer on AmpC Beta-Lactamases: Necessary Knowledge for an  
537 Increasingly Multidrug-Resistant World. *Clin Infect Dis* <https://doi.org/10.1093/cid/ciz173>.
- 538 21. Jacoby GA. 2009. AmpC beta-lactamases. *Clin Microbiol Rev* 22:161–182.

- 539 22. Mataseje LF, Boyd DA, Delpont J, Hoang L, Imperial M, Lefebvre B, Kuhn M, Van Caesele P,  
540 Willey BM, Mulvey MR. 2014. *Serratia marcescens* harbouring SME-type class A  
541 carbapenemases in Canada and the presence of blaSME on a novel genomic island,  
542 SmarGI1-1. *J Antimicrob Chemother* 69:1825–1829.
- 543 23. Bush K, Pannell M, Lock JL, Queenan AM, Jorgensen JH, Lee RM, Lewis JS, Jarrett D. 2013.  
544 Detection systems for carbapenemase gene identification should include the SME serine  
545 carbapenemase. *Int J Antimicrob Agents* 41:1–4.
- 546 24. Hopkins KL, Findlay J, Meunier D, Cummins M, Curtis S, Kustos I, Mustafa N, Perry C, Pike R,  
547 Woodford N. 2017. *Serratia marcescens* producing SME carbapenemases: an emerging  
548 resistance problem in the UK? *J Antimicrob Chemother* 72:1535–1537.
- 549 25. Queenan AM, Torres-Viera C, Gold HS, Carmeli Y, Eliopoulos GM, Moellering RC Jr, Quinn  
550 JP, Hindler J, Medeiros AA, Bush K. 2000. SME-type carbapenem-hydrolyzing class A beta-  
551 lactamases from geographically diverse *Serratia marcescens* strains. *Antimicrob Agents*  
552 *Chemother* 44:3035–3039.
- 553 26. Bush K, Jacoby GA. 2010. Updated functional classification of beta-lactamases. *Antimicrob*  
554 *Agents Chemother* 54:969–976.
- 555 27. Hemarajata P, Amick T, Yang S, Gregson A, Holzmeyer C, Bush K, Humphries RM. 2018.  
556 Selection of hyperproduction of AmpC and SME-1 in a carbapenem-resistant *Serratia*  
557 *marcescens* isolate during antibiotic therapy. *J Antimicrob Chemother* 73:1256–1262.

- 558 28. Cain AK, Barquist L, Goodman AL, Paulsen IT, Parkhill J, van Opijnen T. 2020. A decade of  
559 advances in transposon-insertion sequencing. *Nat Rev Genet* 21:526–540.
- 560 29. Chao MC, Abel S, Davis BM, Waldor MK. 2016. The design and analysis of transposon  
561 insertion sequencing experiments. *Nat Rev Microbiol* 14:119–128.
- 562 30. Valentino MD, Foulston L, Sadaka A, Kos VN, Villet RA, Santa Maria J Jr, Lazinski DW,  
563 Camilli A, Walker S, Hooper DC, Gilmore MS. 2014. Genes contributing to *Staphylococcus*  
564 *aureus* fitness in abscess- and infection-related ecologies. *MBio* 5:e01729-14.
- 565 31. Anderson MT, Mitchell LA, Zhao L, Mobley HLT. 2017. Capsule Production and Glucose  
566 Metabolism Dictate Fitness during *Serratia marcescens* Bacteremia. *MBio* 8.
- 567 32. van Opijnen T, Camilli A. 2013. Transposon insertion sequencing: a new tool for systems-  
568 level analysis of microorganisms. *Nat Rev Microbiol* 11:435–442.
- 569 33. Gallagher LA, Shendure J, Manoil C. 2011. Genome-scale identification of resistance  
570 functions in *Pseudomonas aeruginosa* using Tn-seq. *MBio* 2:e00315-10.
- 571 34. Bellerose MM, Proulx MK, Smith CM, Baker RE, Ioerger TR, Sasseti CM. 2020. Distinct  
572 Bacterial Pathways Influence the Efficacy of Antibiotics against *Mycobacterium*  
573 *tuberculosis*. *mSystems* 5.
- 574 35. Jana B, Cain AK, Doerrler WT, Boinett CJ, Fookes MC, Parkhill J, Guardabassi L. 2017. The  
575 secondary resistome of multidrug-resistant *Klebsiella pneumoniae*. *Sci Rep* 7:42483.

- 576 36. Warr AR, Hubbard TP, Munera D, Blondel CJ, Abel Zur Wiesch P, Abel S, Wang X, Davis BM,  
577 Waldor MK. 2019. Transposon-insertion sequencing screens unveil requirements for EHEC  
578 growth and intestinal colonization. *PLoS Pathog* 15:e1007652.
- 579 37. Chiang SL, Rubin EJ. 2002. Construction of a mariner-based transposon for epitope-tagging  
580 and genomic targeting. *Gene* 296:179–185.
- 581 38. Pritchard JR, Chao MC, Abel S, Davis BM, Baranowski C, Zhang YJ, Rubin EJ, Waldor MK.  
582 2014. ARTIST: high-resolution genome-wide assessment of fitness using transposon-  
583 insertion sequencing. *PLoS Genet* 10:e1004782.
- 584 39. Zhao L, Anderson MT, Wu W, T Mobley HL, Bachman MA. 2017. TnseqDiff: identification of  
585 conditionally essential genes in transposon sequencing studies. *BMC Bioinformatics*  
586 18:326.
- 587 40. Luo H, Lin Y, Liu T, Lai F-L, Zhang C-T, Gao F, Zhang R. 2021. DEG 15, an update of the  
588 Database of Essential Genes that includes built-in analysis tools. *Nucleic Acids Res*  
589 49:D677–D686.
- 590 41. Baba T, Ara T, Hasegawa M, Takai Y, Okumura Y, Baba M, Datsenko KA, Tomita M, Wanner  
591 BL, Mori H. 2006. Construction of *Escherichia coli* K-12 in-frame, single-gene knockout  
592 mutants: the Keio collection. *Mol Syst Biol* 2:2006.0008.
- 593 42. Bolard A, Schniederjans M, Haüssler S, Triponney P, Valot B, Plésiat P, Jeannot K. 2019.  
594 Production of Norspermidine Contributes to Aminoglycoside Resistance in *pmrAB* Mutants  
595 of *Pseudomonas aeruginosa*. *Antimicrob Agents Chemother* 63.

- 596 43. Ekiert DC, Bhabha G, Isom GL, Greenan G, Ovchinnikov S, Henderson IR, Cox JS, Vale RD.  
597 2017. Architectures of lipid transport systems for the bacterial outer membrane. *Cell*  
598 169:273-285.e17.
- 599 44. Uehara T, Parzych KR, Dinh T, Bernhardt TG. 2010. Daughter cell separation is controlled  
600 by cytokinetic ring-activated cell wall hydrolysis. *EMBO J* 29:1412–1422.
- 601 45. Uehara T, Suefuji K, Jaeger T, Mayer C, Park JT. 2006. MurQ Etherase is required by  
602 *Escherichia coli* in order to metabolize anhydro-N-acetylmuramic acid obtained either from  
603 the environment or from its own cell wall. *J Bacteriol* 188:1660–1662.
- 604 46. Van Boeckel TP, Gandra S, Ashok A, Caudron Q, Grenfell BT, Levin SA, Laxminarayan R.  
605 2014. Global antibiotic consumption 2000 to 2010: an analysis of national pharmaceutical  
606 sales data. *Lancet Infect Dis* 14:742–750.
- 607 47. Siedner MJ, Galar A, Guzmán-Suarez BB, Kubiak DW, Baghdady N, Ferraro MJ, Hooper DC,  
608 O’Brien TF, Marty FM. 2014. Cefepime vs other antibacterial agents for the treatment of  
609 *Enterobacter* species bacteremia. *Clin Infect Dis* 58:1554–1563.
- 610 48. Hooper DC. 1999. Mode of action of fluoroquinolones. *Drugs* 58 Suppl 2:6–10.
- 611 49. Correia S, Poeta P, Hébraud M, Capelo JL, Igrejas G. 2017. Mechanisms of quinolone action  
612 and resistance: where do we stand? *J Med Microbiol* 66:551–559.
- 613 50. Mitchell AM, Silhavy TJ. 2019. Envelope stress responses: balancing damage repair and  
614 toxicity. *Nat Rev Microbiol* <https://doi.org/10.1038/s41579-019-0199-0>.

- 615 51. Cohen SP, McMurry LM, Hooper DC, Wolfson JS, Levy SB. 1989. Cross-resistance to  
616 fluoroquinolones in multiple-antibiotic-resistant (Mar) *Escherichia coli* selected by  
617 tetracycline or chloramphenicol: decreased drug accumulation associated with membrane  
618 changes in addition to OmpF reduction. *Antimicrob Agents Chemother* 33:1318–1325.
- 619 52. Lovelle M, Mach T, Mahendran KR, Weingart H, Winterhalter M, Gameiro P. 2011.  
620 Interaction of cephalosporins with outer membrane channels of *Escherichia coli*. Revealing  
621 binding by fluorescence quenching and ion conductance fluctuations. *Phys Chem Chem*  
622 *Phys* 13:1521–1530.
- 623 53. Chenia HY, Pillay B, Pillay D. 2006. Analysis of the mechanisms of fluoroquinolone  
624 resistance in urinary tract pathogens. *J Antimicrob Chemother* 58:1274–1278.
- 625 54. Griffith KL, Shah IM, Wolf RE Jr. 2004. Proteolytic degradation of *Escherichia coli*  
626 transcription activators SoxS and MarA as the mechanism for reversing the induction of  
627 the superoxide (SoxRS) and multiple antibiotic resistance (Mar) regulons. *Mol Microbiol*  
628 51:1801–1816.
- 629 55. Nicoloff H, Andersson DI. 2013. Lon protease inactivation, or translocation of the lon gene,  
630 potentiate bacterial evolution to antibiotic resistance. *Mol Microbiol* 90:1233–1248.
- 631 56. Will WR, Brzovic P, Le Trong I, Stenkamp RE, Lawrenz MB, Karlinsey JE, Navarre WW, Main-  
632 Hester K, Miller VL, Libby SJ, Fang FC. 2019. The evolution of SlyA/RovA transcription  
633 factors from repressors to countersilencers in Enterobacteriaceae. *MBio* 10.

- 634 57. Curran TD, Abacha F, Hibberd SP, Rolfe MD, Lacey MM, Green J. 2017. Identification of  
635 new members of the *Escherichia coli* K-12 MG1655 SlyA regulon. *Microbiology* 163:400–  
636 409.
- 637 58. Lazarus JE, Warr AR, Kuehl CJ, Giorgio RT, Davis BM, Waldor MK. 2019. A New Suite of  
638 Allelic Exchange Vectors for the Scarless Modification of Proteobacterial Genomes. *Appl*  
639 *Environ Microbiol* <https://doi.org/10.1128/AEM.00990-19>.
- 640 59. Niemann GS, Brown RN, Gustin JK, Stufkens A, Shaikh-Kidwai AS, Li J, McDermott JE,  
641 Brewer HM, Schepmoes A, Smith RD, Adkins JN, Heffron F. 2011. Discovery of novel  
642 secreted virulence factors from *Salmonella enterica* serovar Typhimurium by proteomic  
643 analysis of culture supernatants. *Infect Immun* 79:33–43.
- 644 60. Sontag RL, Nakayasu ES, Brown RN, Niemann GS, Sydor MA, Sanchez O, Ansong C, Lu S-Y,  
645 Choi H, Valleau D, Weitz KK, Savchenko A, Cambronnie ED, Adkins JN. 2016. Identification  
646 of Novel Host Interactors of Effectors Secreted by *Salmonella* and *Citrobacter*. *mSystems* 11:  
e00553-16.
- 647 61. Rudd KE. 2000. EcoGene: a genome sequence database for *Escherichia coli* K-12. *Nucleic*  
648 *Acids Res* 28:60–64.
- 649 62. de Avila E Silva S, Echeverrigaray S, Gerhardt GJL. 2011. BacPP: bacterial promoter  
650 prediction--a tool for accurate sigma-factor specific assignment in enterobacteria. *J Theor*  
651 *Biol* 287:92–99.
- 652 63. Macke TJ, Ecker DJ, Gutell RR, Gautheret D, Case DA, Sampath R. 2001. RNAMotif, an RNA  
653 secondary structure definition and search algorithm. *Nucleic Acids Res* 29:4724–4735.



- 654 64. Yethon JA, Vinogradov E, Perry MB, Whitfield C. 2000. Mutation of the lipopolysaccharide  
655 core glycosyltransferase encoded by waaG destabilizes the outer membrane of *Escherichia*  
656 *coli* by interfering with core phosphorylation. *J Bacteriol* 182:5620–5623.
- 657 65. Vinogradov E, Lindner B, Seltmann G, Radziejewska-Lebrecht J, Holst O. 2006.  
658 Lipopolysaccharides from *Serratia marcescens* possess one or two 4-amino-4-deoxy-L-  
659 arabinopyranose 1-phosphate residues in the lipid A and D-glycero-D-talo-oct-2-  
660 ulopyranosonic acid in the inner core region. *Chemistry* 12:6692–6700.
- 661 66. Anderson MT, Mitchell LA, Mobley HLT. 2017. Cysteine Biosynthesis Controls *Serratia*  
662 *marcescens* Phospholipase Activity. *J Bacteriol* 199.
- 663 67. Almagro Armenteros JJ, Tsirigos KD, Sønderby CK, Petersen TN, Winther O, Brunak S, von  
664 Heijne G, Nielsen H. 2019. SignalP 5.0 improves signal peptide predictions using deep  
665 neural networks. *Nat Biotechnol* <https://doi.org/10.1038/s41587-019-0036-z>.
- 666 68. Sueki A, Stein F, Savitski MM, Selkig J, Typas A. 2020. Systematic Localization of  
667 *Escherichia coli* Membrane Proteins. *mSystems* 5.
- 668 69. Han M-J, Kim JY, Kim JA. 2014. Comparison of the large-scale periplasmic proteomes of the  
669 *Escherichia coli* K-12 and B strains. *J Biosci Bioeng* 117:437–442.
- 670 70. Schmidt A, Kochanowski K, Vedelaar S, Ahrné E, Volkmer B, Callipo L, Knoops K, Bauer M,  
671 Aebersold R, Heinemann M. 2016. The quantitative and condition-dependent *Escherichia*  
672 *coli* proteome. *Nat Biotechnol* 34:104–110.

- 673 71. Hammann P, Parmentier D, Cerciat M, Reimegård J, Helfer A-C, Boisset S, Guillier M,  
674 Vandenesch F, Wagner EGH, Romby P, Fechter P. 2014. A method to map changes in  
675 bacterial surface composition induced by regulatory RNAs in *Escherichia coli* and  
676 *Staphylococcus aureus*. *Biochimie* 106:175–179.
- 677 72. Hulsen T, de Vlieg J, Alkema W. 2008. BioVenn - a web application for the comparison and  
678 visualization of biological lists using area-proportional Venn diagrams. *BMC Genomics*  
679 9:488.
- 680 73. Tu Q, Yin J, Fu J, Herrmann J, Li Y, Yin Y, Stewart AF, Müller R, Zhang Y. 2016. Room  
681 temperature electrocompetent bacterial cells improve DNA transformation and  
682 recombineering efficiency. *Sci Rep* 6:24648.
- 683 74. Jones DT, Taylor WR, Thornton JM. 1992. The rapid generation of mutation data matrices  
684 from protein sequences. *Comput Appl Biosci* 8:275–282.
- 685 75. Kumar S, Stecher G, Li M, Knyaz C, Tamura K. 2018. MEGA X: Molecular Evolutionary  
686 Genetics Analysis across Computing Platforms. *Mol Biol Evol* 35:1547–1549.
- 687 76. Van Domselaar GH, Stothard P, Shrivastava S, Cruz JA, Guo A, Dong X, Lu P, Szafron D,  
688 Greiner R, Wishart DS. 2005. BASys: a web server for automated bacterial genome  
689 annotation. *Nucleic Acids Res* 33:W455-9.
- 690 77. Galperin MY, Makarova KS, Wolf YI, Koonin EV. 2015. Expanded microbial genome  
691 coverage and improved protein family annotation in the COG database. *Nucleic Acids Res*  
692 43:D261-9.

- 693 78. UniProt Consortium. 2019. UniProt: a worldwide hub of protein knowledge. *Nucleic Acids*  
694 *Res* 47:D506–D515.
- 695 79. Karp PD, Ong WK, Paley S, Billington R, Caspi R, Fulcher C, Kothari A, Krummenacker M,  
696 Latendresse M, Midford PE, Subhraveti P, Gama-Castro S, Muñiz-Rascado L, Bonavides-  
697 Martinez C, Santos-Zavaleta A, Mackie A, Collado-Vides J, Keseler IM, Paulsen I. 2018. The  
698 EcoCyc Database. *EcoSal Plus* 8.
- 699

700 **Figure legends:**

701 **Figure 1** – *S. marcescens* ATCC 13880 transposon-insertion sequencing reveals genes important  
702 for *in vitro* growth. A) *S. marcescens* genes binned by percent of TA sites within that gene  
703 disrupted. Overlaid is the hidden Markov model-based analysis assignment (“EL-ARTIST”  
704 pipeline) of whether insertions within the gene are underrepresented, vary by domain  
705 within the gene (“domain”), or are found to be distributed neutrally within the gene. The  
706 left histogram peak contains predominantly underrepresented genes where insertions are  
707 tolerated in only a low percentage of sites. B) Venn diagram illustrating overlap between *S.*  
708 *marcescens* ATCC 13880 (SMM13880) underrepresented genes (red) with *E. coli* K-12  
709 underrepresented genes (yellow), with the K-12 KEIO collection as an additional  
710 comparator (blue). C) Genes underrepresented in *S. marcescens* ATCC 13880 but not in *E.*  
711 *coli* K12 either by EL-ARTIST or by the analysis resulting from the KEIO collection. COG  
712 categories of those genes are tabulated. D) Lipid A 4-amino-4-deoxy-L-arbinose  
713 modification operon, demonstrating that transposon insertions are underrepresented  
714 (red) in *arnD*, *arnE*, and *arnF*. *btuD* and *nlpC* are genes flanking this operon.

715 **Figure 2** – Antibiotic screen reveals *S. marcescens* genes important for growth and survival. A)  
716 Screen schematic: An input library (containing about 2 million insertion mutants) is grown  
717 to OD 0.1 and divided between 4 conditions for an additional 6 hours of growth: LB alone;  
718 LB + cefoxitin 4 ug/mL; LB + cefepime 0.025 ug/mL; and LB + ciprofloxacin 0.05 ug/mL. B)  
719 Under screen conditions, the library without drug selection undergoes more than 2 log  
720 expansion while those with antibiotic decrease in CFU to similar extent (about 0.5 log),

721 with the library in cefoxitin undergoes expansion after 4 hours, likely due to upregulation  
722 of AmpC beta-lactamase. Libraries are harvested for analysis at 6 hours. C) Number of  
723 genes with insertion-mutants showing  $\geq 4$ -fold change at 6 hours, compared to outgrowth  
724 in LB alone. D) Venn diagram illustrating genes showing coordinate enrichment or  
725 depletion.

726 **Figure 3** – Whole genome screen for modifiers of cefoxitin susceptibility. A) “Volcano” plot  
727 illustrating candidate genes important for cefoxitin susceptibility. On the X-axis is the  
728  $\log_2$ fold-change ( $\text{Log}_2\text{FC}$ ) in insertion-mutant abundance in cefoxitin (FOX) compared to no  
729 drug. The Y-axis is the inverse Mann-Whitney U  $p$ -value ( $1/\text{MWU } p\text{-val}$ ), which roughly  
730 measures the concordance between mutants with insertions at individual TA sites across a  
731 gene. Genes were depleted (red) if  $\text{Log}_2\text{FC} \leq 2$  and  $1/\text{MWU } p\text{-val} \geq 100$ . Genes were  
732 enriched (blue) if  $\text{Log}_2\text{FC} \geq 2$  and  $1/\text{MWU } p\text{-val} \geq 100$ . B) Selected genes enriched or  
733 depleted in cefoxitin were tabulated. Genes important for envelope integrity and  
734 peptidoglycan recycling are depleted. *ydgH*, an enriched poorly-characterized gene, is also  
735 highlighted. C) Growth of various *S. marcescens* gene deletion mutants in cefoxitin 4  
736  $\mu\text{g}/\text{mL}$ . Growth is depicted as  $\text{CFU}_{\text{mutant}}/\text{CFU}_{\text{Wt}}$  (in cefoxitin) /  $\text{CFU}_{\text{mutant}}/\text{CFU}_{\text{Wt}}$  (in LB alone).  
737 Though no mutant had large defects in LB alone, due to stochastic errors in dilution to  
738 starting CFU, this improved the repeatability of the experiment.

739 **Figure 4** – *YdgH* contributes to basal *S. marcescens* cefoxitin susceptibility. A) The *YdgH* locus on  
740 the Y-axis with transposon-insertion (Tn) reads on the Y axis, demonstrating the large  
741 enrichment of *YdgH* insertion mutants in cefoxitin (below, compared to the input library,

742 above, on the same scale). B)  $\Delta ydgH$  has increased growth in cefoxitin compared to Wt at  
743 multiple drug concentrations and at multiple time points. C) Schematic illustrating OD<sub>600</sub>  
744 ratio used in subsequent figures: The OD<sub>600</sub> of  $\Delta ydgH$  at 4 hours is divided by that of Wt. D)  
745 Exogenous *ydgH* rescues the cefoxitin phenotype in  $\Delta ydgH$ . Asterisks are \* for  $p \leq 0.05$  and  
746 \*\* for  $p \leq 0.01$  by unpaired two-tailed *t* test.

747 **Figure 5** – *YdgH* deletion leads to decreased cephalosporin susceptibility and increased  
748 detergent susceptibility. A) OD600 ratios demonstrating that  $\Delta ydgH$  has decreased 2<sup>nd</sup> and  
749 3<sup>rd</sup> generation cephalosporin susceptibility (including cefoxitin, moxalactam, and  
750 ceftriaxone) but no large differences in 1<sup>st</sup> generation cephalosporins, anti-Pseudomonal  
751 cephalosporins, penicillins, or carbapenems. B) OD600 ratios demonstrating that  $\Delta ydgH$   
752 has no large differences in non-beta lactam antibiotics. Cefoxitin ratio reproduced for  
753 reference. C) OD600 ratios demonstrating that  $\Delta ydgH$  has no large differences in bacitracin  
754 or polymyxin susceptibility, but has small but significant increases in susceptibility to  
755 rifampin, and more broadly to the detergents sodium dodecyl sulfate (SDS), benzethonium  
756 chloride and benzalkonium chloride. Cefoxitin ratio reproduced for reference. Asterisks  
757 are \* for  $p \leq 0.05$  and \*\* for  $p \leq 0.01$  by unpaired two-tailed *t* test.

758 **Figure 6** – *YdgH* deletion results in conserved phenotypes in *Escherichia coli* O157:H7 EDL933  
759 and *Enterobacter cloacae* ATCC 13047. A) The *YdgH* phylogeny was constructed based on  
760 amino acid substitutions by using the Maximum Likelihood method and JTT matrix-based  
761 model in MEGA-X. The relevant higher order families are indicated. B) All 3 mutants have  
762 decreased susceptibility to ceftriaxone (*E. cloacae* has high intrinsic resistance to cefoxitin

763 so ceftriaxone was chosen) as well as increased susceptibility to benzethonium chloride.  
764 Growth of *E. cloacae*  $\Delta ydgH$  was decreased in SDS though growth of *E. coli* O157:H7 was  
765 not. Due to inherent differences in Wt susceptibility, concentrations varied considerably  
766 between isolates and were ceftriaxone (4 ug/mL for *E. cloacae*, 0.04 ug/mL for *E. coli*  
767 O157:H7, 0.06 ug/mL for *S. marcescens*), benzethonium chloride (BTC, 10 ug/mL for *E.*  
768 *cloacae*, 18 ug/mL for *E. coli* O157:H7, 52 ug/mL for *S. marcescens*), and SDS (0.8% for *E.*  
769 *cloacae*, 0.13% for *E. coli* O157:H7, 5% for *S. marcescens*).

770 **Supplemental table 1** – Essential/underrepresented gene analysis of *S. marcescens* ATCC 13880  
771 as determined through TIS and the EL-ARTIST pipeline. Summary statistics of  
772 essential/underrepresented genes underlying the analyses in Figure 1 are tabulated.

773 **Supplemental table 2** – Essential/underrepresented genes unique to *S. marcescens* ATCC 13880  
774 compared to both from *E. coli* K12 using either TIS and the EL-ARTIST pipeline or based on  
775 single gene deletion attempts resulting in the KEIO collection.

776 **Supplemental table 3** – TIS analysis identifying candidate genes important for outgrowth in no  
777 drug, ceftiofur, cefepime, or ciprofloxacin. Genes identified in all 3 antibiotics (compared  
778 to in no drug alone) are also tabulated.

779 **Supplemental table 4** – Raw data from all final concentrations of chemical/antibiotic stressors  
780 used to generate main text figure 5 and the corresponding supplemental figures.

781 **Supplemental table 5** – Primers used for creation of pTOX3 allelic exchange vectors and  
782 pBAD33-*ydgH*.

**A**

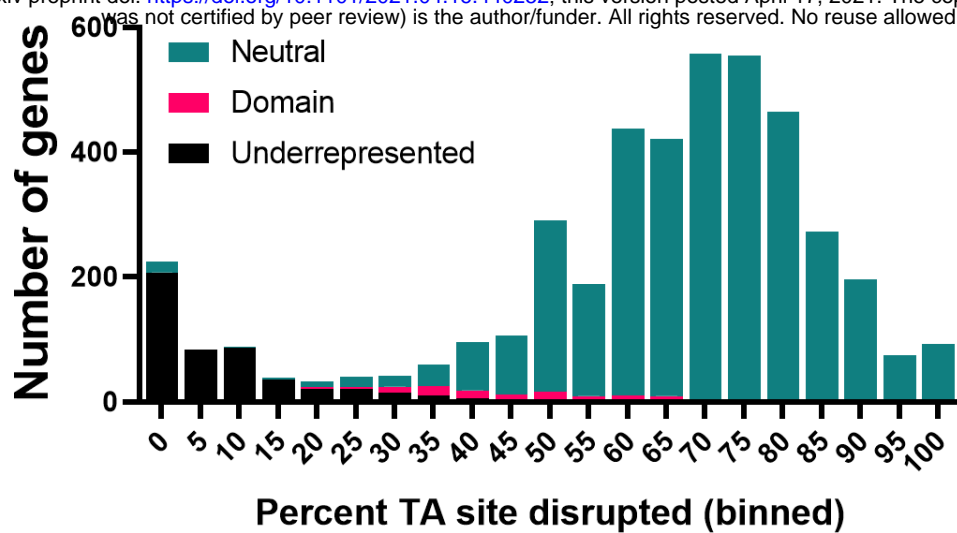

**B**

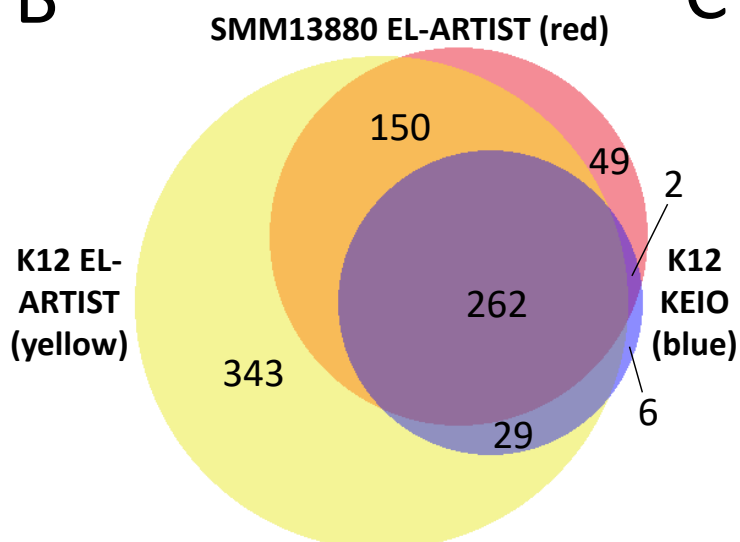

**C**

| COG category                                                 | Genes |
|--------------------------------------------------------------|-------|
| Cell wall/membrane/envelope biogenesis                       | 9     |
| Transcription                                                | 7     |
| Carbohydrate metabolism and transport                        | 6     |
| Translation                                                  | 4     |
| Cell cycle control and mitosis                               | 3     |
| Post-translational modification, protein turnover, chaperone | 3     |
| Poorly characterized                                         | 3     |
| Energy production and conversion                             | 2     |
| Amino acid metabolism and transport                          | 2     |
| Replication and repair                                       | 2     |
| Intracellular trafficking and secretion                      | 2     |
| Defense mechanisms                                           | 2     |

**D**

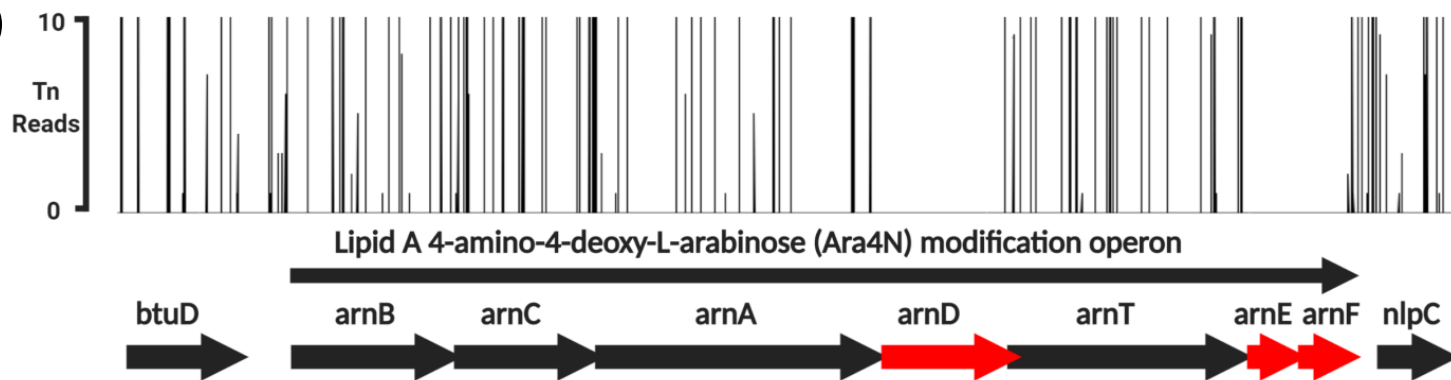



**A**

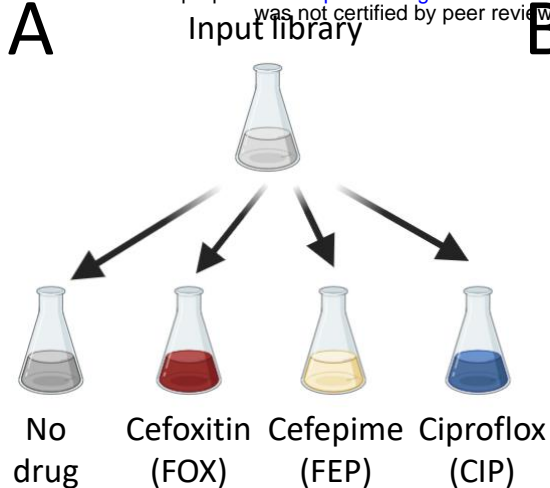

**B**

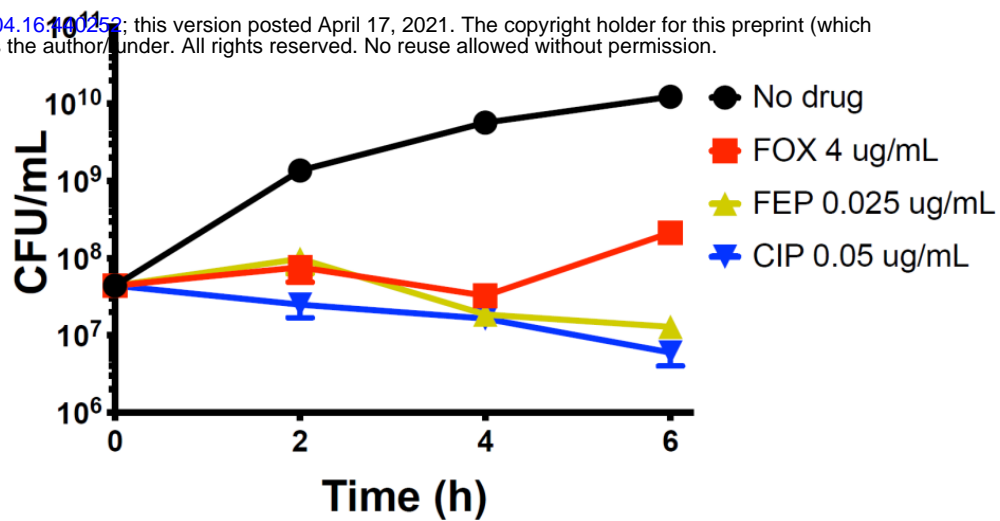

**C**

|               | Depleted | Enriched |
|---------------|----------|----------|
| Cefoxitin     | 161      | 57       |
| Cefepime      | 113      | 39       |
| Ciprofloxacin | 152      | 39       |

**D**

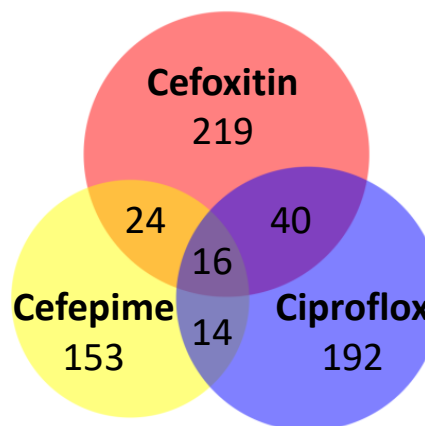

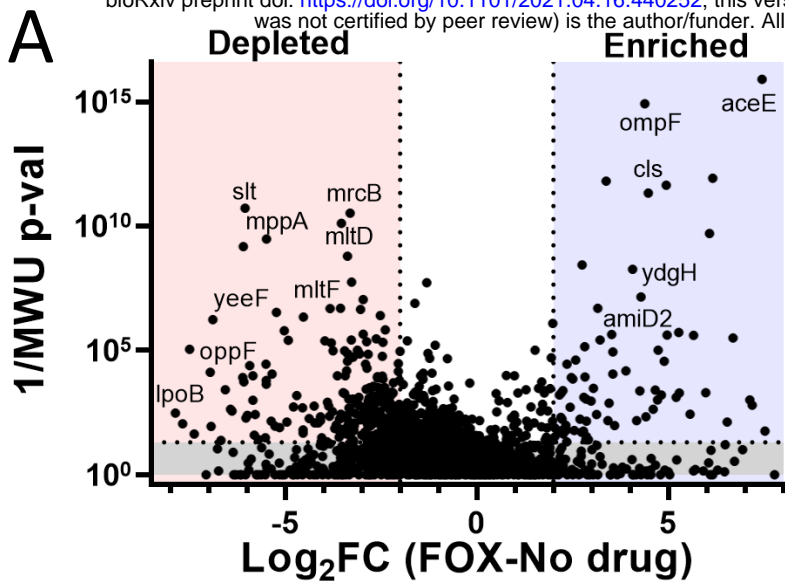

**Depleted**

| Gene | Protein annotation                             | 1/p     | log <sub>2</sub> MFC |
|------|------------------------------------------------|---------|----------------------|
| oppF | Oligopeptide transport ATP-binding protein     | 2.6E+03 | -6.56                |
| mppA | Periplasmic murein peptide-binding protein     | 3.0E+09 | -5.48                |
| mltF | Membrane-bound lytic murein transglycosylase F | 4.8E+06 | -3.82                |
| mltD | Membrane-bound lytic murein transglycosylase D | 1.3E+10 | -3.53                |
| mrcB | Penicillin-binding protein 1B                  | 3.3E+10 | -3.30                |
| dapA | Dihydrodipicolinate synthase                   | 2.5E+02 | -2.95                |
| ampC | Beta-lactamase                                 | 3.0E+03 | -2.55                |
| mltC | Membrane-bound lytic murein transglycosylase C | 9.1E+03 | -2.46                |

**Enriched**

| Gene  | Protein annotation                            | 1/p     | log <sub>2</sub> MFC |
|-------|-----------------------------------------------|---------|----------------------|
| cls   | Cardiolipin synthase                          | 4.4E+11 | 4.95                 |
| ydgH  | Periplasmic DUF1471 domain-containing protein | 1.4E+07 | 4.29                 |
| cpxP  | Modulator of Cpx envelope stress response     | 2.3E+03 | 4.26                 |
| amiD2 | N-acetylmuramoyl-L-alanine amidase AmiD2      | 1.1E+04 | 3.56                 |
| BamB  | Lipoprotein component of BAM complex          | 4.9E+06 | 3.16                 |

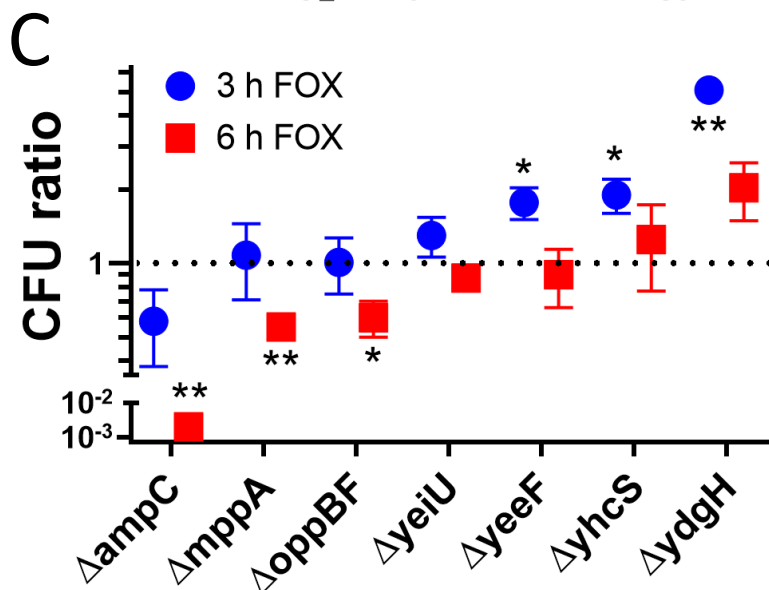

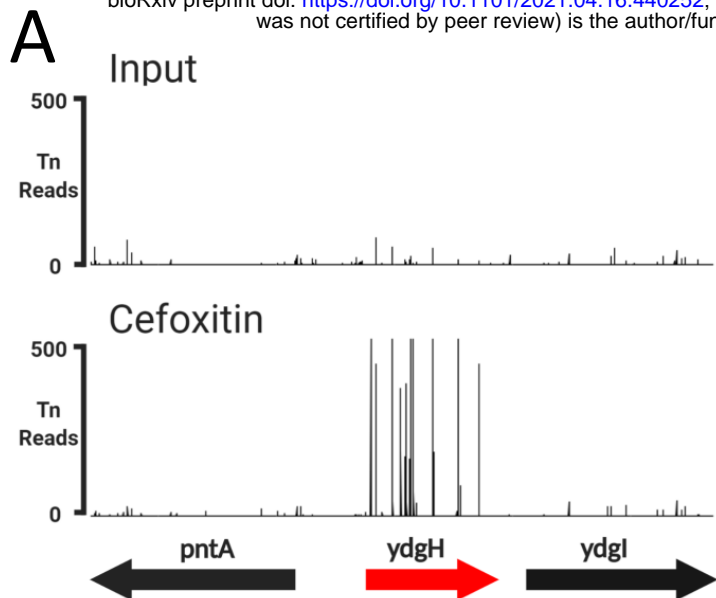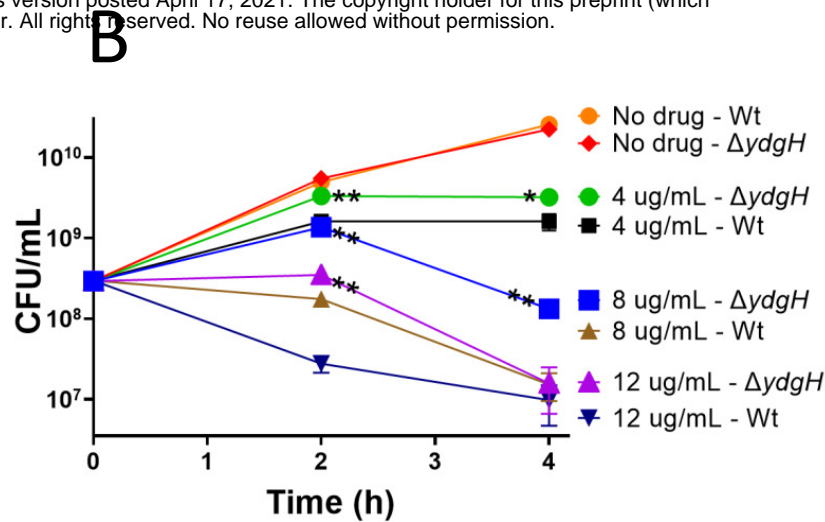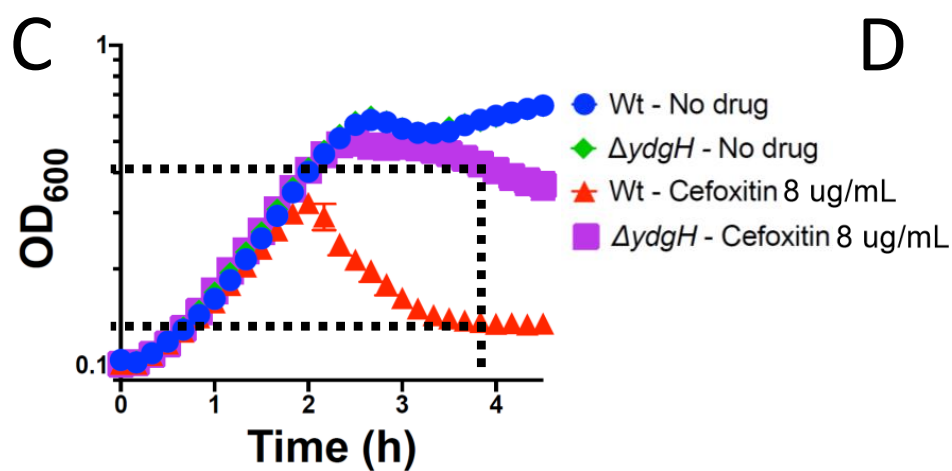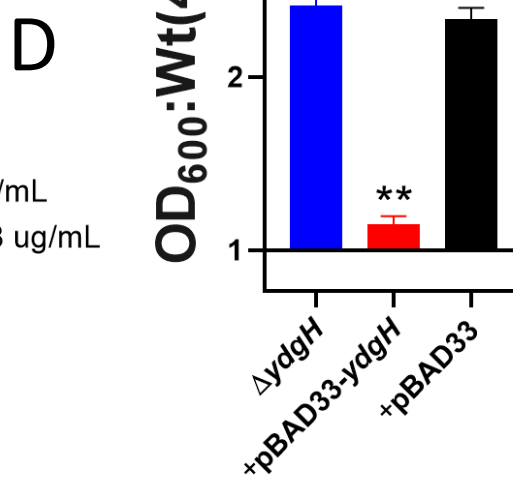

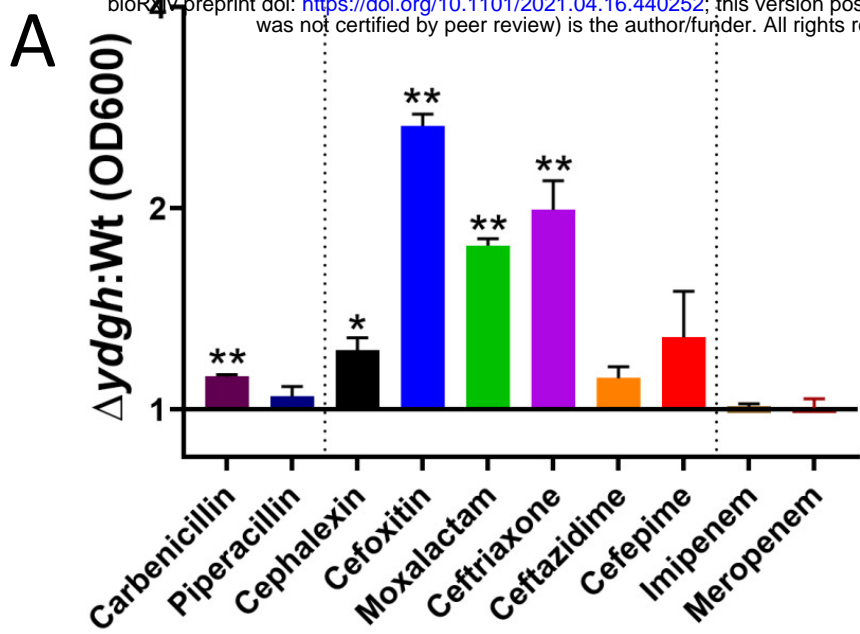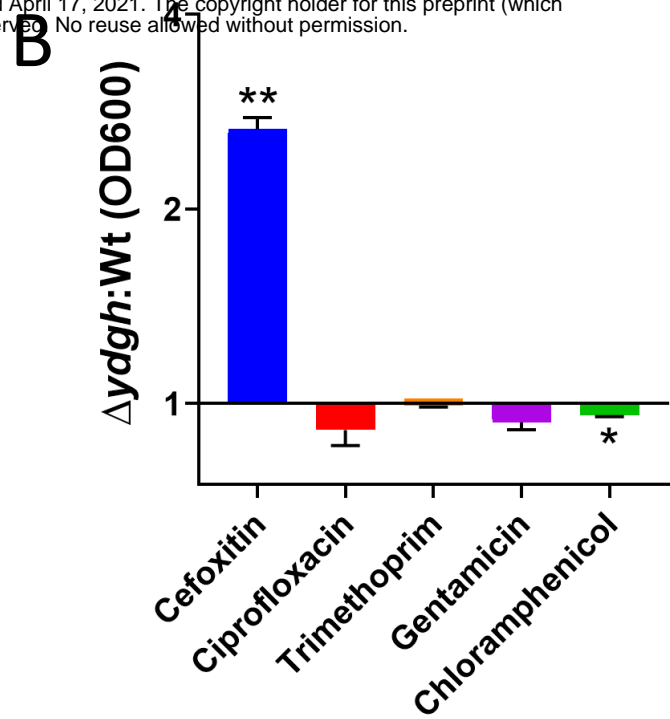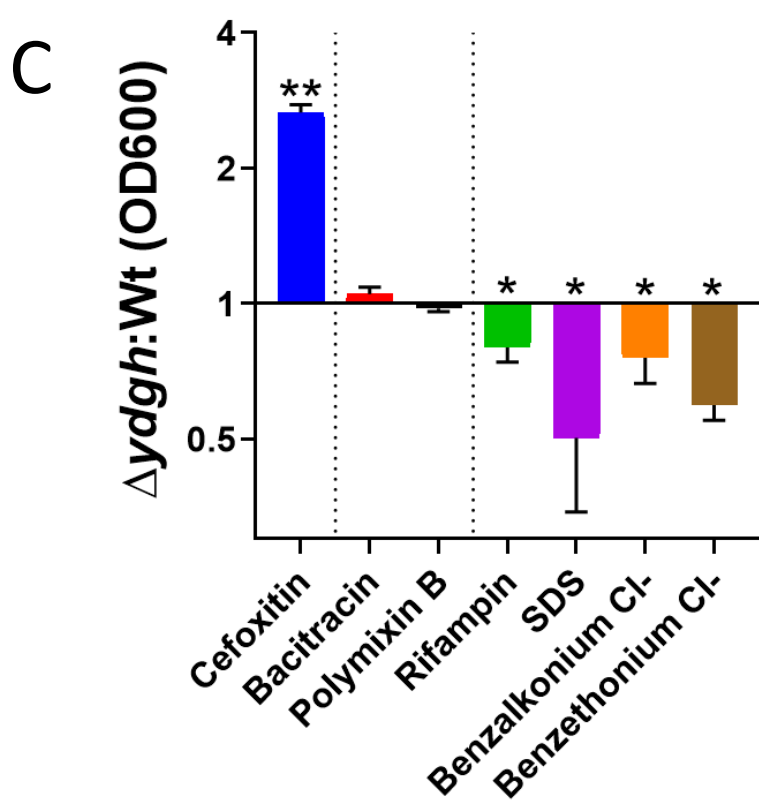

**A**

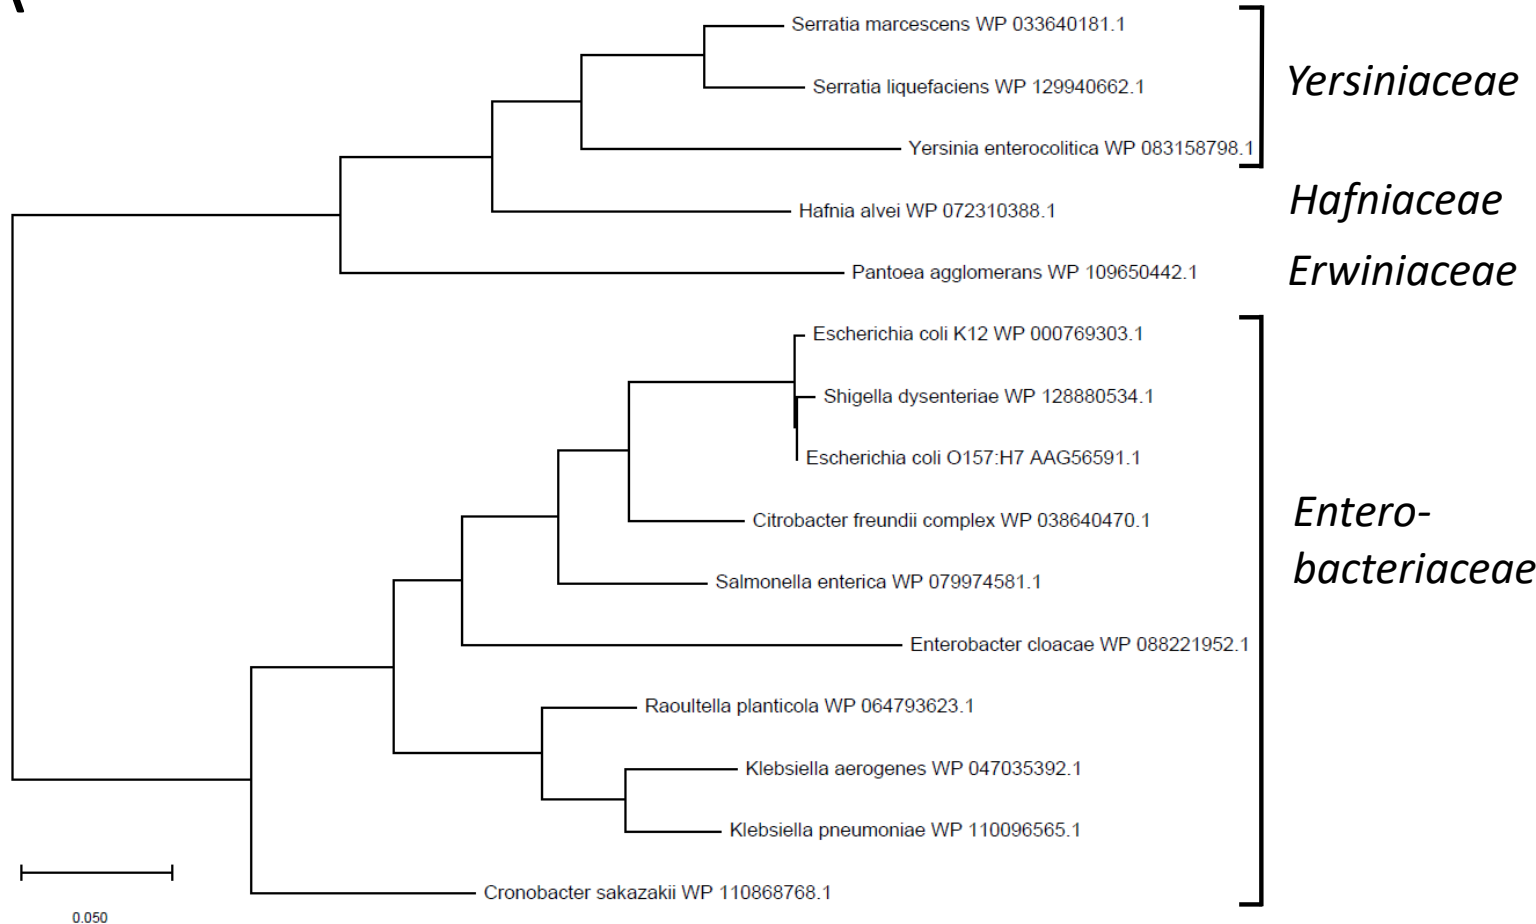

**B**

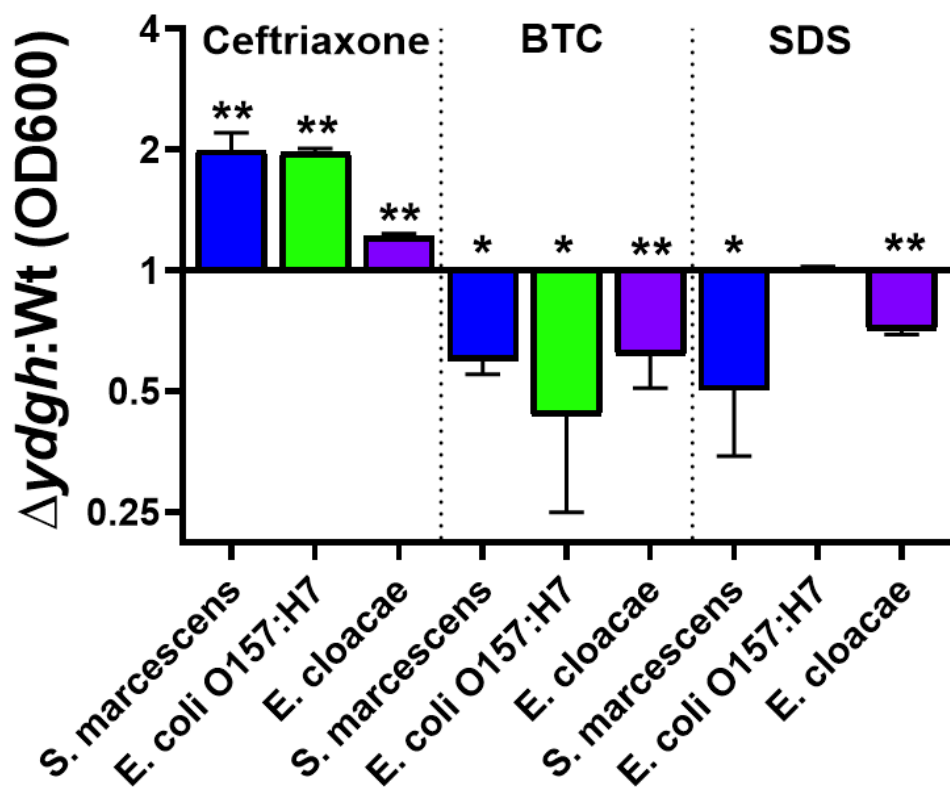

1 **Supplemental figure legends:**

2 **Supplemental Figure 1** – A) Depiction of represented neutral, underrepresented and domain  
3 genes. On the X-axis, the 3 genes are represented 5' to 3' to relative scale, with number of  
4 transposon (Tn) reads at that TA site on the Y axis. Many TA sites had more than 10 reads. B)  
5 OD<sub>600</sub> of *S. marcescens* ATCC 13880 TIS library during the antibiotic screen. C) Beta-lactamase  
6 (AmpC) activity under conditions of the antibiotic screen. As expected, cefoxitin, which is a  
7 strong inducer of AmpC, results in large increases in beta-lactamase activity, as determined  
8 through hydrolysis of nitrocefin, a chromogenic cephalosporin substrate. D,E) “Volcano” plot  
9 illustrating candidate genes important for ciprofloxacin (in D) and cefepime (in E) susceptibility.  
10 On the X-axis is the log<sub>2</sub>fold-change (Log<sub>2</sub>FC) in insertion-mutant abundance in antibiotic (CIP  
11 and FEP) compared to no drug. The Y-axis is the inverse Mann-Whitney U *p*-value (1/MWU *p*-  
12 val), which roughly measures the concordance between mutants with insertions at individual  
13 TA sites across a gene. Genes were depleted (red) if Log<sub>2</sub>FC ≤ 2 and 1/MWU *p*-val ≥ 100. Genes  
14 were enriched (blue) if Log<sub>2</sub>FC ≥ 2 and 1/MWU *p*-val ≥ 100.

15 **Supplemental Figure 2** – *YdgH* locus. Sigma-70 promoters with scores of 90 or greater in BacPP  
16 and rho-independent terminators identified by ARNold are indicated.

17 **Supplemental Figure 3** – Growth curves of *S. marcescens* ATCC 13880 Wt or  $\Delta ydgH$  in LB alone  
18 or in LB supplemented with the indicated concentrations (in ug/mL) of A) the 3<sup>rd</sup> generation  
19 cephalosporin moxalactam; B) the 3<sup>rd</sup> generation cephalosporin ceftriaxone; C) the 1<sup>st</sup>  
20 generation cephalosporin cephalixin; D) the anti-Pseudomonal cephalosporins ceftazidime and  
21 E) cefepime. Informative concentrations used in calculating the OD600 ratios depicted in the

22 main text are depicted. Results for the full range of concentrations tested are in Supplemental  
23 Table 4.

24 **Supplemental Figure 4** – Growth curves of *S. marcescens* ATCC 13880 Wt or  $\Delta ydgH$  in LB alone  
25 or in LB supplemented with the indicated concentrations (in ug/mL) of the penicillins A)  
26 carbenicillin or B) piperacillin; and the carbapenems C) imipenem and D) meropenem. E) AmpC  
27 activity is not different in  $\Delta ydgH$  compared to Wt, as measured by bulk nitrocefin hydrolysis of  
28 clarified supernatant.

29 **Supplemental Figure 5** - Growth curves of *S. marcescens* ATCC 13880 Wt or  $\Delta ydgH$  in LB alone  
30 or in LB supplemented with the indicated concentrations (in ug/mL) of the non-beta lactam  
31 antibiotics A) ciprofloxacin; B) trimethoprim; C) gentamicin and; D) chloramphenicol.

32 **Supplemental Figure 6** - Growth curves of *S. marcescens* ATCC 13880 Wt or  $\Delta ydgH$  in LB alone  
33 or in LB supplemented with the indicated concentrations (in ug/mL) of the antibiotics to which  
34 *S. marcescens* ATCC 13880 is intrinsically resistant, A) rifampin; B) bacitracin; and F) polymyxin  
35 B). Benzalkonium chloride and benzethonium chloride are depicted in D) and E). SDS  
36 concentrations in C) are (v/v).
